# Supplementary material for: Syntheses and characterizations of the in vivo replicative bypass and mutagenic properties of the minor-groove O2-alkylthymidine lesions
Source: PubMed Central journal article supplement — Nucleic Acids Res. 2014 Aug 12;42(16):10529–37. doi: 10.1093/nar/gku748 (PMC4176383; doi:10.1093/nar/gku748), 2014-08-12
Supplement: supp_gku748_nar-01846-d-2014-File002.pdf [file supp_gku748_nar-01846-d-2014-File002.pdf]

**Supplementary Materials for**  
**“Syntheses and Characterizations of the *in-vivo* Replicative Bypass and**  
**Mutagenic Properties of the Minor-groove  $O^2$ -Alkylthymidine Lesions”**

**by Qianqian Zhai, Pengcheng Wang, Qian Cai and Yinsheng Wang**

*Nucleic Acids Res.*, 2014

## Supplementary Materials and Methods:

### Mass spectrometry (MS) and NMR

Electrospray ionization-MS (ESI-MS) and tandem MS (MS/MS) experiments were carried out on an LCQ Deca XP ion-trap mass spectrometer (Thermo Fisher Scientific, San Jose, CA). A mixture of acetonitrile and water (50:50, v/v) was used as solvent for electrospray. The spray voltage was 3.0 kV, and the temperature for the ion transport tube was maintained at 275°C. High-resolution mass spectra (HRMS) were acquired on an Agilent 6210 ESI-TOF instrument (Agilent Technologies, Palo Alto, CA).  $^1\text{H}$  and  $^{31}\text{P}$  NMR spectra were recorded at 300 MHz and 80 MHz, respectively, on a Varian Inova 300 instrument (Varian Inc., Palo Alto, CA).

2D NMR spectra were recorded at 25°C in  $\text{CD}_3\text{OD}$  or  $\text{DMSO}-d_6$  using a Bruker Unity spectrometer operated at 600 MHz (Bruker, Co., Fremont, CA). Resonance assignments for  $O^2$ -*i*PrdT,  $O^2$ -*s*BudT and  $O^2$ -*i*BudT were made based on  $^1\text{H}$ - $^{13}\text{C}$  heteronuclear multi-bond correlation (HMBC) experiments, where the HMBC spectra were acquired using sweep widths of 6613.8 Hz and 30183.6 Hz for  $^1\text{H}$  and  $^{13}\text{C}$ , respectively. The first and second delays were set to match a 145-Hz coupling constant and a long-range coupling constant of 10 Hz, respectively.

### Reaction yields and NMR and mass spectrometric characterizations of the synthetic products:

**$O^2$ -*n*-propylthymidine ( $O^2$ -*n*PrdT, **2c**).** Obtained as a white solid (41% yield).  $^1\text{H}$  NMR (300 MHz,  $\text{CDCl}_3$ ):  $\delta$  7.80 (s, 1H), 6.19 (t,  $J = 5.9$  Hz, 1H), 4.57 (s, 1H), 4.38 (t,  $J = 6.6$  Hz, 2H), 4.08 – 3.93 (m, 3H), 3.04 (d,  $J = 4.1$  Hz, 1H), 2.92 (t,  $J = 4.9$  Hz, 1H), 2.47 – 2.37 (m, 1H), 2.28 – 2.20 (m, 1H), 1.96 (s, 3H), 1.78 (dq,  $J = 14.5, 7.1$  Hz, 2H), 0.99 (t,  $J = 7.4$  Hz, 3H). HRMS (ESI) calcd for  $\text{C}_{13}\text{H}_{21}\text{N}_2\text{O}_5$   $[\text{M}+\text{H}]^+$   $m/z$  285.1455, found  $m/z$  285.1471.

**$O^2$ -*iso*-propylthymidine ( $O^2$ -*i*PrdT, **2d**).** Obtained as a white solid (47% yield).  $^1\text{H}$  NMR (300 MHz,  $\text{CDCl}_3$ ):  $\delta$  7.81 (s, 1H), 6.16 (t,  $J = 5.8$  Hz, 1H), 5.46 (dt,  $J = 11.6, 5.8$  Hz, 1H), 4.57 (s, 1H), 3.98 (s, 2H), 3.51 (s, 1H), 3.21 (s, 1H), 3.09 (s, 1H), 2.47 – 2.16 (m, 2H), 1.95 (s, 3H), 1.36 (s, 3H), 1.34 (s, 3H). HRMS (ESI) calcd for  $\text{C}_{13}\text{H}_{21}\text{N}_2\text{O}_5$   $[\text{M}+\text{H}]^+$   $m/z$  285.1455, found  $m/z$  285.1469.

**$O^2$ -*n*-butylthymidine ( $O^2$ -*n*BudT, **2e**).** Obtained as a colorless film (36% yield).  $^1\text{H}$  NMR (300

MHz, CDCl<sub>3</sub>): δ 8.01 (s, 1H), 6.14 (dd, *J* = 6.3, 4.8 Hz, 1H), 4.58 (dd, *J* = 11.1, 6.1 Hz, 1H), 4.40 (t, *J* = 6.6 Hz, 2H), 3.98 (s, 3H), 2.90 (br, 2H), 2.50 – 2.37 (m, 1H), 2.28 – 2.16 (m, 1H), 1.94 (s, 3H), 1.72 (dd, *J* = 14.1, 7.2 Hz, 2H), 1.42 (dd, *J* = 15.2, 7.4 Hz, 2H), 0.95 (t, *J* = 7.4 Hz, 3H).

HRMS (ESI) calcd for C<sub>14</sub>H<sub>23</sub>N<sub>2</sub>O<sub>5</sub> [M+H]<sup>+</sup> *m/z* 299.1601, found *m/z* 299.1622.

***O*<sup>2</sup>-*sec*-butylthymidine (*O*<sup>2</sup>-*s*BudT, 2f).** Obtained as a colorless film (53% yield). <sup>1</sup>H NMR (300 MHz, CDCl<sub>3</sub>): δ 8.00 (s, 1H), 6.14 (dd, *J* = 11.1, 5.6 Hz, 1H), 5.36 – 5.21 (m, 1H), 4.58 (dd, *J* = 11.0, 6.4 Hz, 1H), 4.39 – 4.22 (m, 1H), 3.98 (s, 2H), 2.96 (br, 2H), 2.49 – 2.38 (m, 1H), 2.28 – 2.17 (m, 1H), 1.96 (s, 3H), 1.77 – 1.60 (m, 2H), 1.31 (dd, *J* = 6.2, 2.3 Hz, 3H), 0.93 (td, *J* = 7.4, 2.4 Hz, 3H). HRMS (ESI) calcd for C<sub>14</sub>H<sub>23</sub>N<sub>2</sub>O<sub>5</sub> [M+H]<sup>+</sup> *m/z* 299.1601, found *m/z* 299.1624.

***O*<sup>2</sup>-*isobutyl*thymidine (*O*<sup>2</sup>-*i*BudT, 2g).** Obtained as a colorless film (58% yield). <sup>1</sup>H NMR (300 MHz, CDCl<sub>3</sub>): δ 8.01 (s, 1H), 6.15 (dd, *J* = 6.2, 4.7 Hz, 1H), 4.57 (s, 1H), 4.17 (d, *J* = 6.6 Hz, 2H), 4.01 – 3.96 (m, 3H), 3.50 (s, 1H), 3.48 (s, 1H), 2.48 – 2.40 (m, 1H), 2.29 – 2.17 (m, 1H), 2.13 – 1.99 (m, 1H), 1.93 (s, 3H), 0.99 (s, 3H), 0.97 (s, 3H). HRMS (ESI) calcd for C<sub>14</sub>H<sub>23</sub>N<sub>2</sub>O<sub>5</sub> [M+H]<sup>+</sup> *m/z* 299.1601, found *m/z* 299.1615.

***5'*-*O*-(4,4'-dimethoxytrityl)-*O*<sup>2</sup>-*n*-propylthymidine (DMTr-*O*<sup>2</sup>-*n*PrdT, 3c).** Obtained as a white foam (59% yield). <sup>1</sup>H NMR (300 MHz, CDCl<sub>3</sub>): δ 7.64 (s, 1H), 7.45 – 7.22 (m, 9H), 6.83 (d, *J* = 8.8 Hz, 4H), 6.27 (t, *J* = 6.6 Hz, 1H), 4.58 (dt, *J* = 6.2, 3.3 Hz, 1H), 4.39 (t, *J* = 6.7 Hz, 2H), 4.13 – 4.07 (m, 1H), 3.79 (s, 6H), 3.44 (ddd, *J* = 29.2, 10.6, 3.3 Hz, 2H), 2.46 – 2.32 (m, 2H), 1.78 (dt, *J* = 14.2, 7.1 Hz, 2H), 1.60 (s, 3H), 0.98 (t, *J* = 7.4 Hz, 3H). HRMS (ESI) calcd for C<sub>34</sub>H<sub>39</sub>N<sub>2</sub>O<sub>7</sub> [M+H]<sup>+</sup> *m/z* 587.2752, found *m/z* 587.2776.

***5'*-*O*-(4,4'-dimethoxytrityl)-*O*<sup>2</sup>-*iso*-propylthymidine (DMTr-*O*<sup>2</sup>-*i*PrdT, 3d).** Obtained as a white foam (41% yield). <sup>1</sup>H NMR (300 MHz, acetone-*d*<sub>6</sub>): δ 7.69 (s, 1H), 7.54 – 7.24 (m, 9H), 6.91 (d, *J* = 8.9 Hz, 4H), 6.26 (t, *J* = 6.6 Hz, 1H), 5.33 (dt, *J* = 12.5, 6.2 Hz, 1H), 4.59 (s, 1H), 4.09 (d, *J* = 3.4 Hz, 1H), 3.80 (s, 6H), 3.39 (d, *J* = 3.6 Hz, 2H), 2.44 – 2.36 (m, 2H), 1.52 (s, 3H), 1.36 (dd, *J* = 6.2, 3.8 Hz, 6H). HRMS (ESI) calcd for C<sub>34</sub>H<sub>39</sub>N<sub>2</sub>O<sub>7</sub> [M+H]<sup>+</sup> *m/z* 587.2752, found *m/z* 587.2758.

***5'*-*O*-(4,4'-dimethoxytrityl)-*O*<sup>2</sup>-*n*-butylthymidine (DMTr-*O*<sup>2</sup>-*n*BudT, 3e).** Obtained as a white foam (52% yield). <sup>1</sup>H NMR (300 MHz, acetone-*d*<sub>6</sub>): δ 7.71 (s, 1H), 7.55 – 7.24 (m, 9H), 6.90 (d, *J* = 8.7 Hz, 4H), 6.28 (t, *J* = 6.6 Hz, 1H), 4.60 (dd, *J* = 8.6, 4.7 Hz, 1H), 4.36 (t, *J* = 6.6 Hz, 2H),

4.10 (q,  $J = 3.4$  Hz, 1H), 3.79 (s, 6H), 3.40 (d,  $J = 3.5$  Hz, 2H), 2.43 (t,  $J = 6.0$  Hz, 2H), 1.82 – 1.69 (m, 2H), 1.52 (s, 3H), 1.50 – 1.41 (m, 2H), 0.97 (t,  $J = 7.4$  Hz, 3H). HRMS (ESI) calcd for  $C_{35}H_{41}N_2O_7$   $[M+H]^+$   $m/z$  601.2908, found  $m/z$  601.2897.

**5'-O-(4,4'-dimethoxytrityl)-O<sup>2</sup>-sec-butylthymidine (DMTr-O<sup>2</sup>-sBudT, 3f).** Obtained as a white foam (46% yield). <sup>1</sup>H NMR (300 MHz, acetone-*d*<sub>6</sub>): δ 7.71 (s, 1H), 7.53 – 7.19 (m, 9H), 6.90 (d,  $J = 8.8$  Hz, 4H), 6.32 – 6.24 (m, 1H), 5.25 – 5.15 (m, 1H), 4.60 (s, 1H), 4.09 (s, 1H), 3.80 (s, 6H), 3.40 (s, 2H), 2.45 – 2.38 (m, 2H), 1.72 (td,  $J = 14.0, 7.2$  Hz, 2H), 1.51 (s, 3H), 1.33 (dd,  $J = 6.2, 4.2$  Hz, 3H), 0.96 (t,  $J = 7.4$  Hz, 3H). HRMS (ESI) calcd for  $C_{35}H_{41}N_2O_7$   $[M+H]^+$   $m/z$  601.2908, found  $m/z$  601.2913.

**5'-O-(4,4'-dimethoxytrityl)-O<sup>2</sup>-iso-butylthymidine (DMTr-O<sup>2</sup>-iBudT, 3g).** Obtained as a white foam (55% yield). <sup>1</sup>H NMR (300 MHz, acetone-*d*<sub>6</sub>): δ 7.72 (s, 1H), 7.54 – 7.27 (m, 9H), 6.90 (d,  $J = 8.9$  Hz, 4H), 6.31 (t,  $J = 6.5$  Hz, 1H), 4.62 (dd,  $J = 8.5, 4.9$  Hz, 1H), 4.17 – 4.07 (m, 3H), 3.80 (s, 6H), 3.41 (d,  $J = 3.5$  Hz, 2H), 2.44 (dd,  $J = 6.5, 5.1$  Hz, 2H), 2.11 (dd,  $J = 13.5, 6.7$  Hz, 1H), 1.52 (d,  $J = 1.1$  Hz, 3H), 1.03 (s, 3H), 1.00 (d,  $J = 4.0$  Hz, 3H). HRMS (ESI) calcd for  $C_{35}H_{41}N_2O_7$   $[M+H]^+$   $m/z$  601.2908, found  $m/z$  601.2917.

**4c:** <sup>31</sup>P NMR (CDCl<sub>3</sub>): δ 150.31, 149.78.

**4d:** <sup>31</sup>P NMR (CDCl<sub>3</sub>): δ 150.30, 149.75.

**4e:** <sup>31</sup>P NMR (CDCl<sub>3</sub>): δ 150.42, 149.81.

**4f:** <sup>31</sup>P NMR (CDCl<sub>3</sub>): δ 150.44, 150.36, 149.75.

**4g:** <sup>31</sup>P NMR (CDCl<sub>3</sub>): δ 150.46, 149.73.

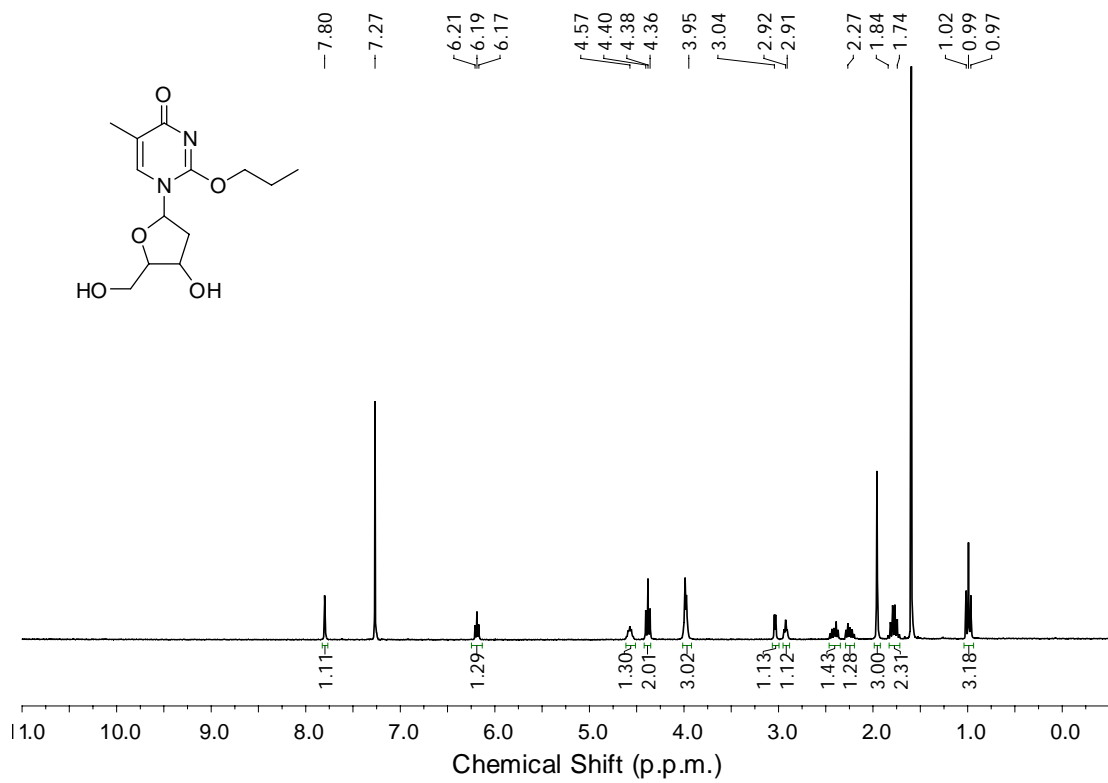

**Figure S1.**  $^1\text{H}$  NMR spectrum of  $O^2$ -*n*PrdT (300 MHz,  $\text{CDCl}_3$ , 25°C).

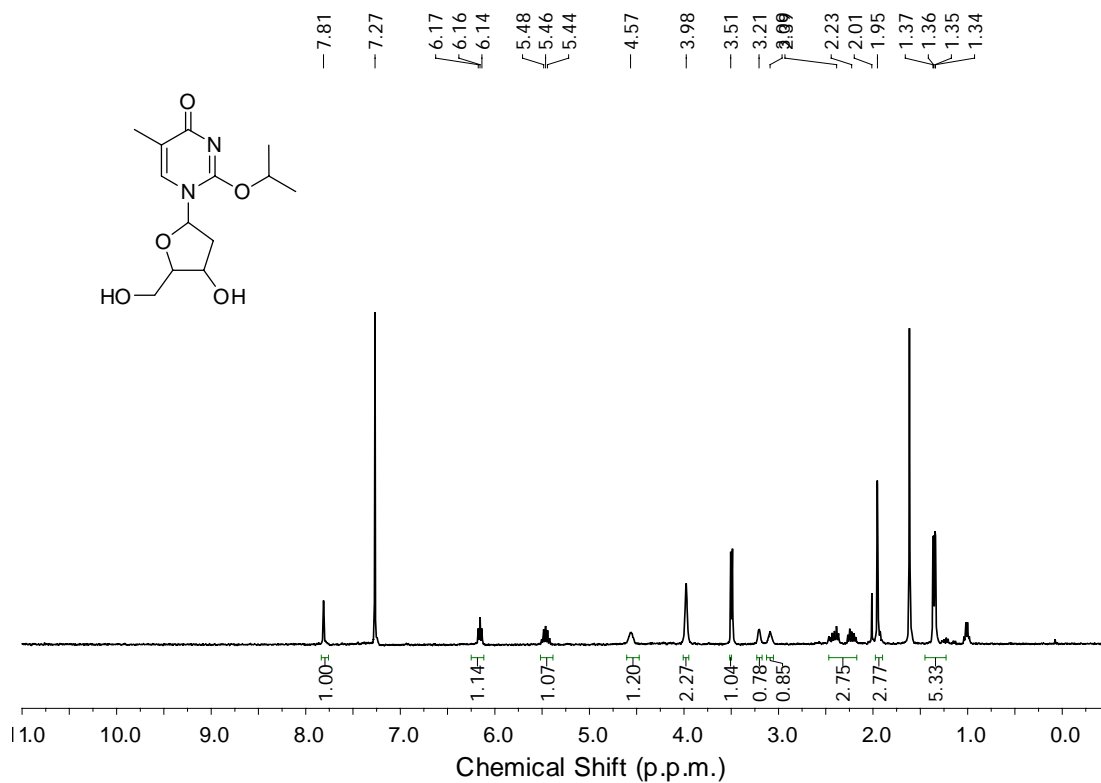

**Figure S2.**  $^1\text{H}$  NMR spectrum of  $O^2$ -*i*PrdT (300 MHz,  $\text{CDCl}_3$ ,  $25^\circ\text{C}$ ).

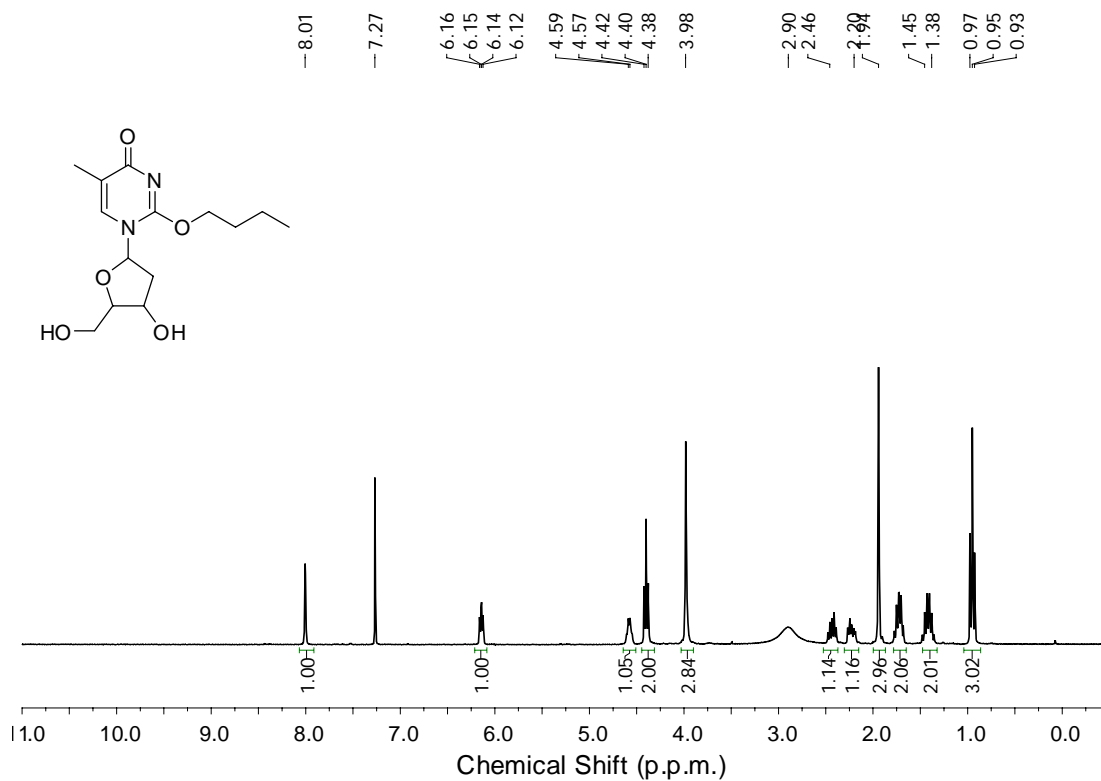

**Figure S3.**  $^1\text{H}$  NMR spectrum of  $O^2$ -*n*BudT (300 MHz,  $\text{CDCl}_3$ ,  $25^\circ\text{C}$ ).

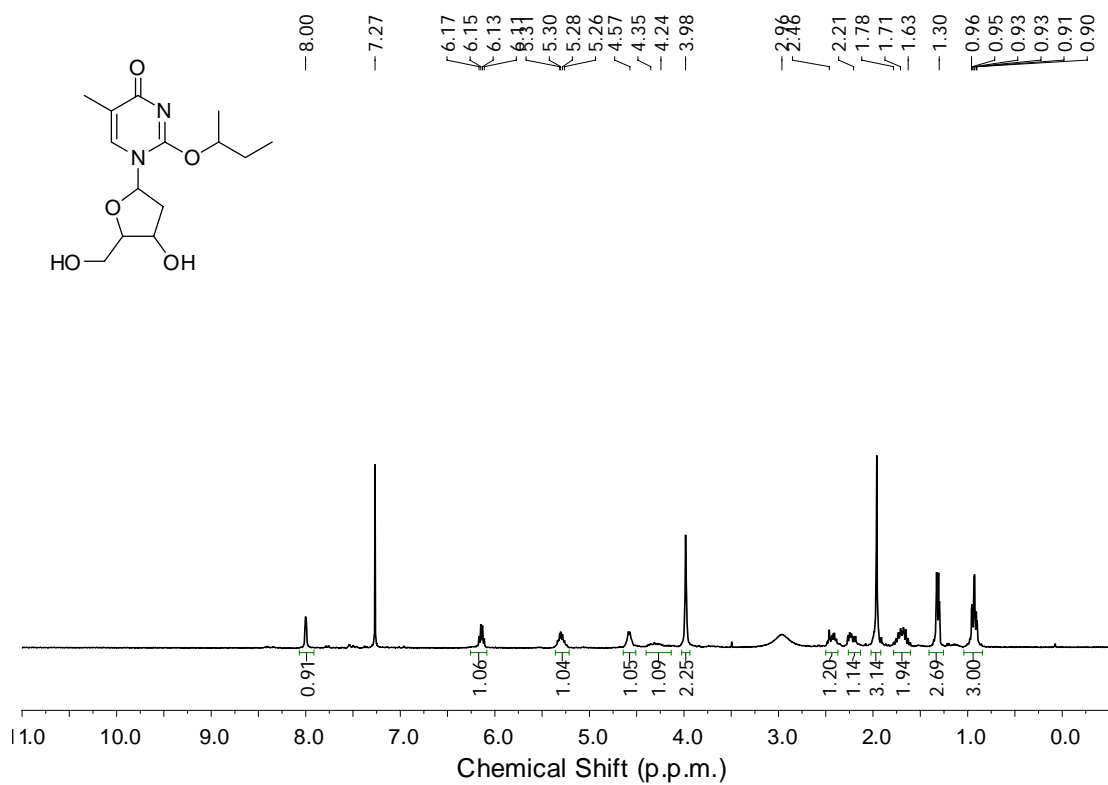

**Figure S4.**  $^1\text{H}$  NMR spectrum of  $O^2$ -sBudT (300 MHz,  $\text{CDCl}_3$ ,  $25^\circ\text{C}$ ).

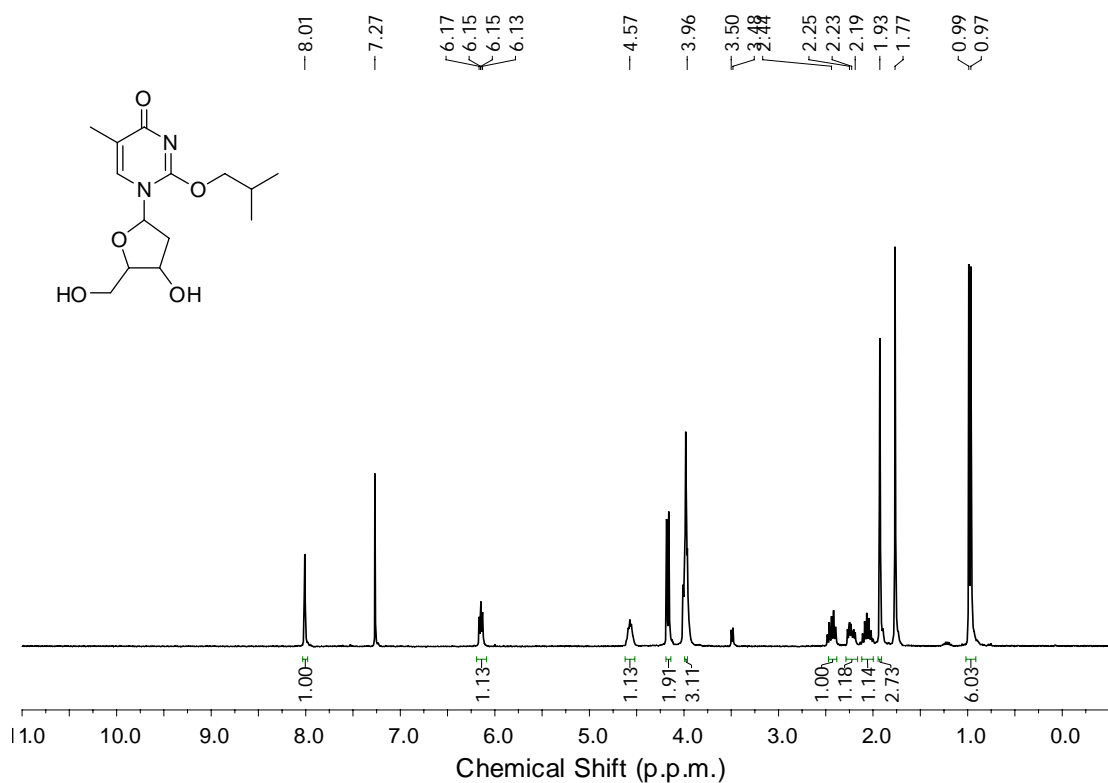

**Figure S5.**  $^1\text{H}$  NMR spectrum of  $O^2$ -iBudT (300 MHz,  $\text{CDCl}_3$ ,  $25^\circ\text{C}$ ).

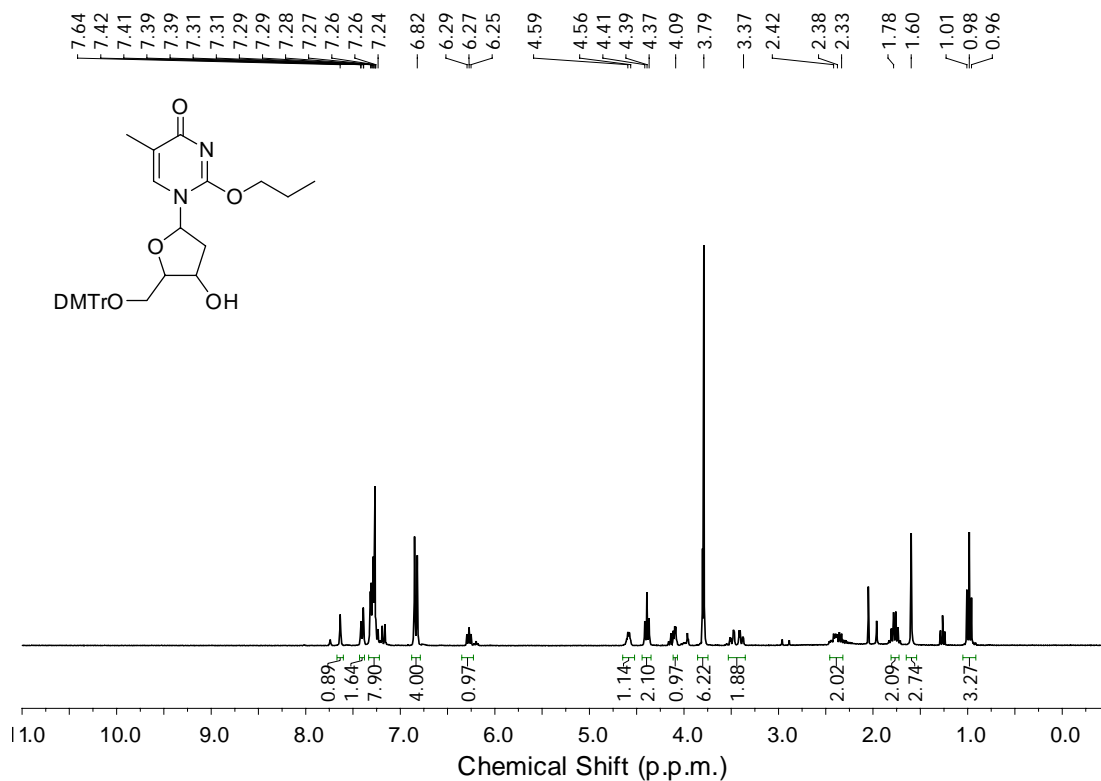

**Figure S6.** <sup>1</sup>H NMR spectrum of 5'-DMTr-*O*<sup>2</sup>-*n*PrdT (300 MHz, CDCl<sub>3</sub>, 25°C).

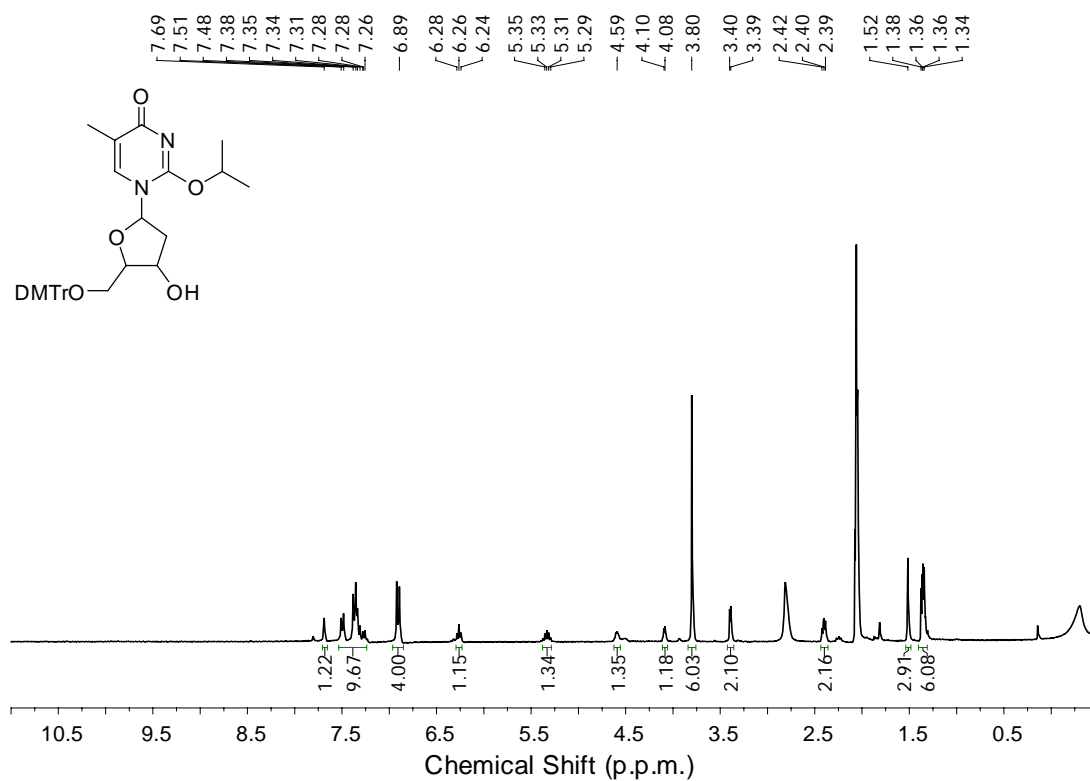

**Figure S7.** <sup>1</sup>H NMR spectrum of 5'-DMTr-*O*<sup>2</sup>-*i*PrdT (300 MHz, acetone-*d*<sub>6</sub>, 25°C).



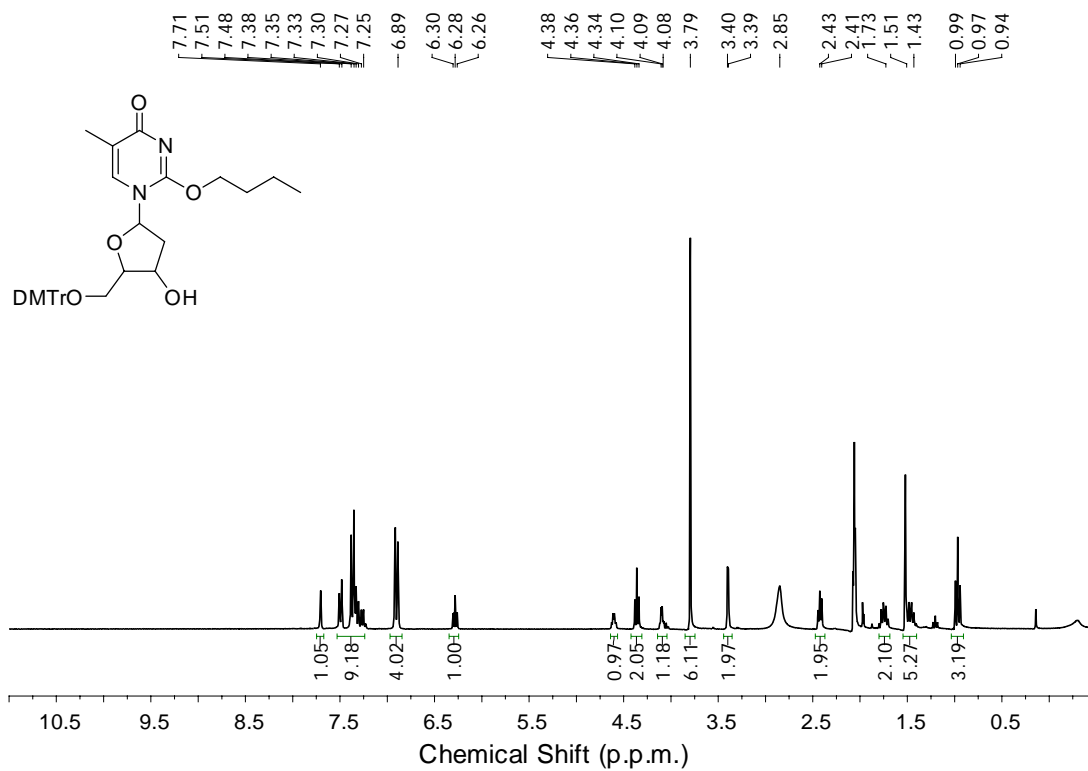

**Figure S8.** <sup>1</sup>H NMR spectrum of 5'-DMTr-*O*<sup>2</sup>-*n*BudT (300 MHz, acetone-*d*<sub>6</sub>, 25°C).

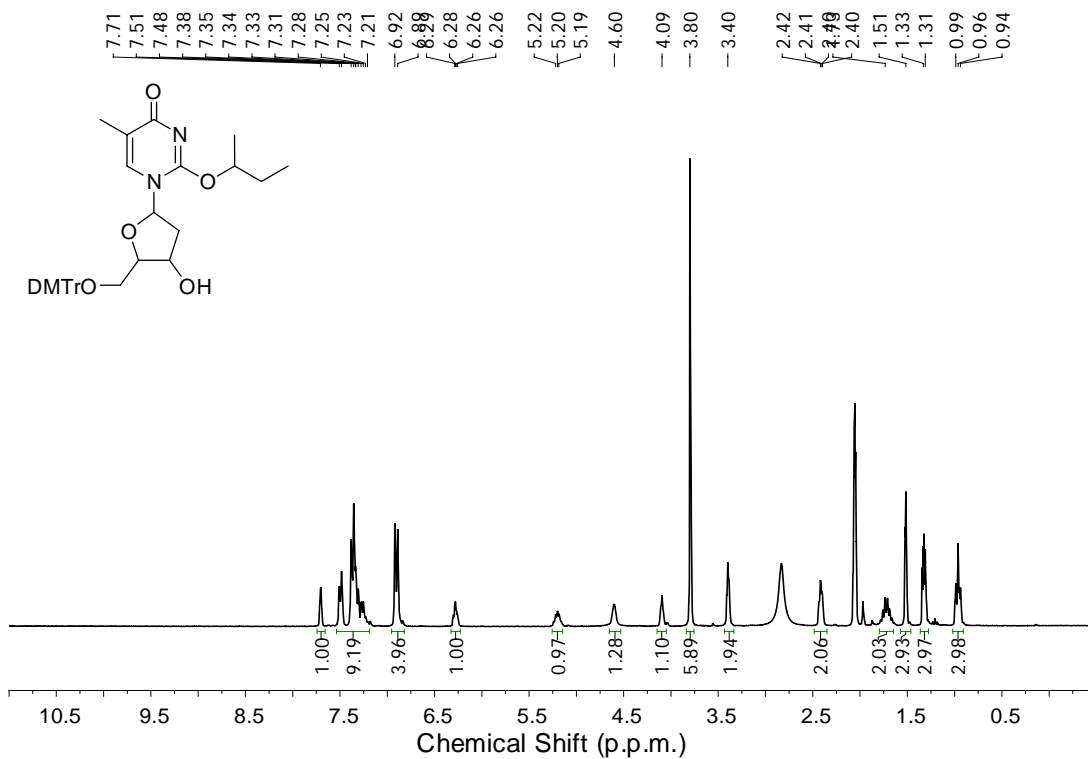

**Figure S9.** <sup>1</sup>H NMR spectrum of 5'-DMTr-*O*<sup>2</sup>-*s*BudT (300 MHz, acetone-*d*<sub>6</sub>, 25°C).

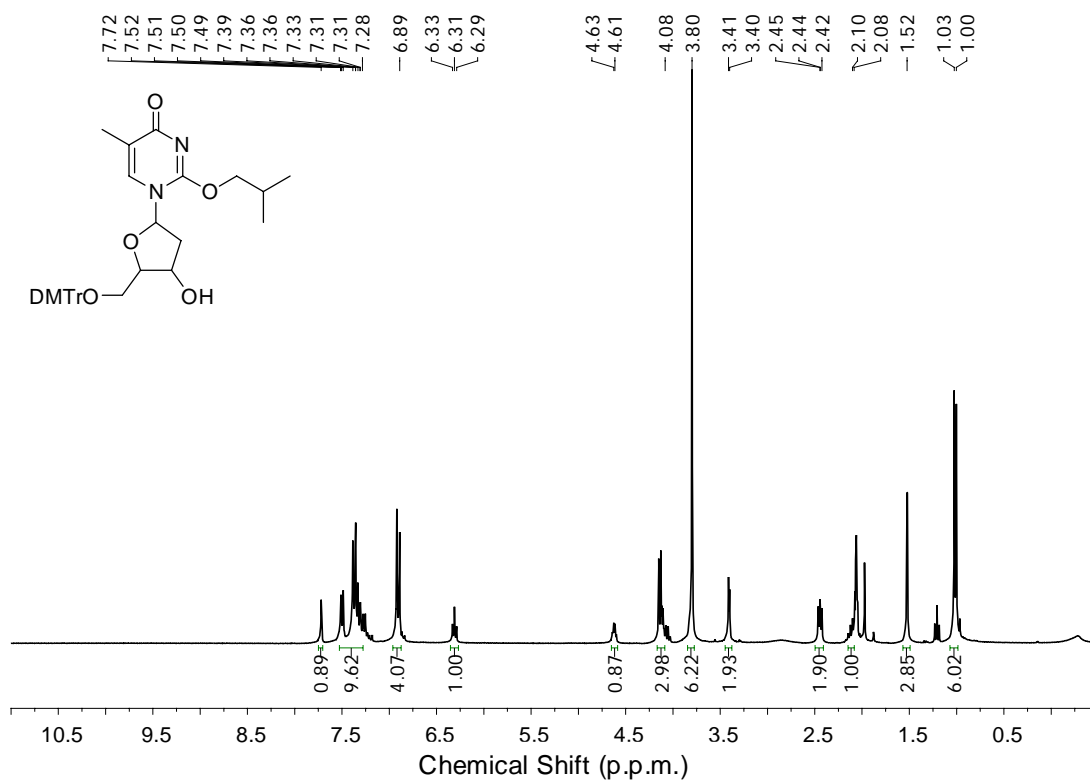

**Figure S10.** <sup>1</sup>H NMR spectrum of 5'-DMTr-*O*<sup>2</sup>-*i*BudT (300 MHz, acetone-*d*<sub>6</sub>, 25°C).

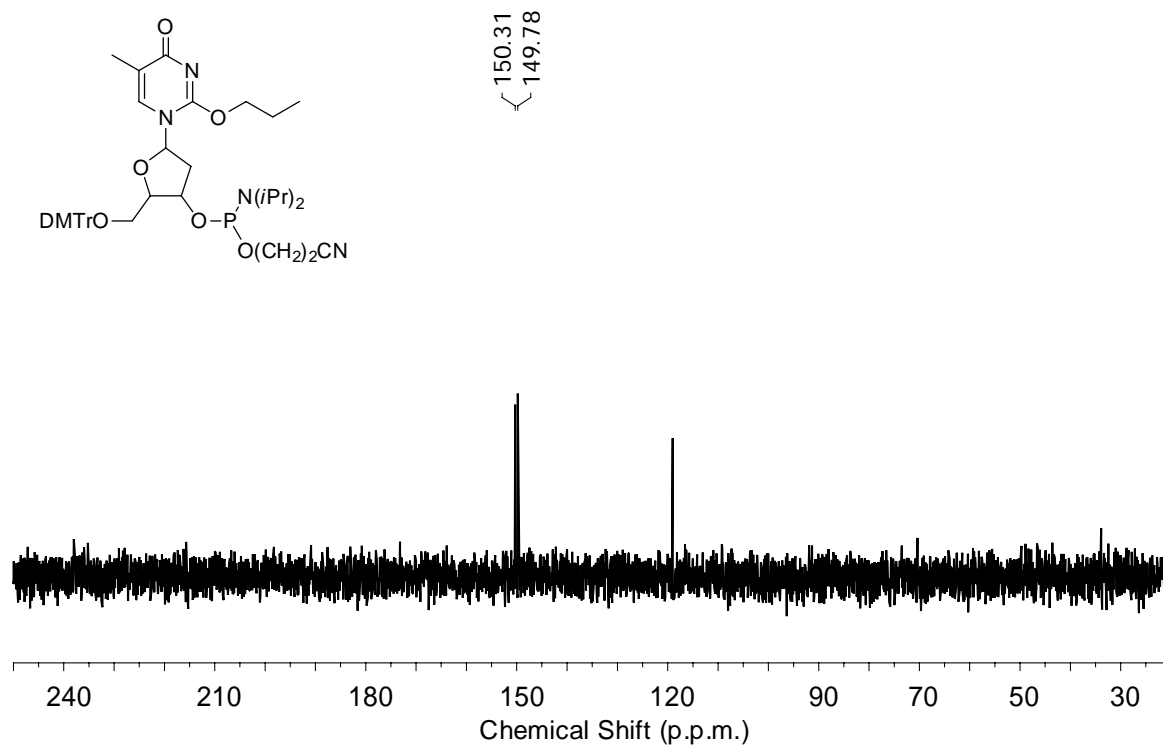

**Figure S11.** <sup>31</sup>P NMR spectrum of phosphoramidite building block of *O*<sup>2</sup>-*n*PrdT (80 MHz, CDCl<sub>3</sub>, 25°C).

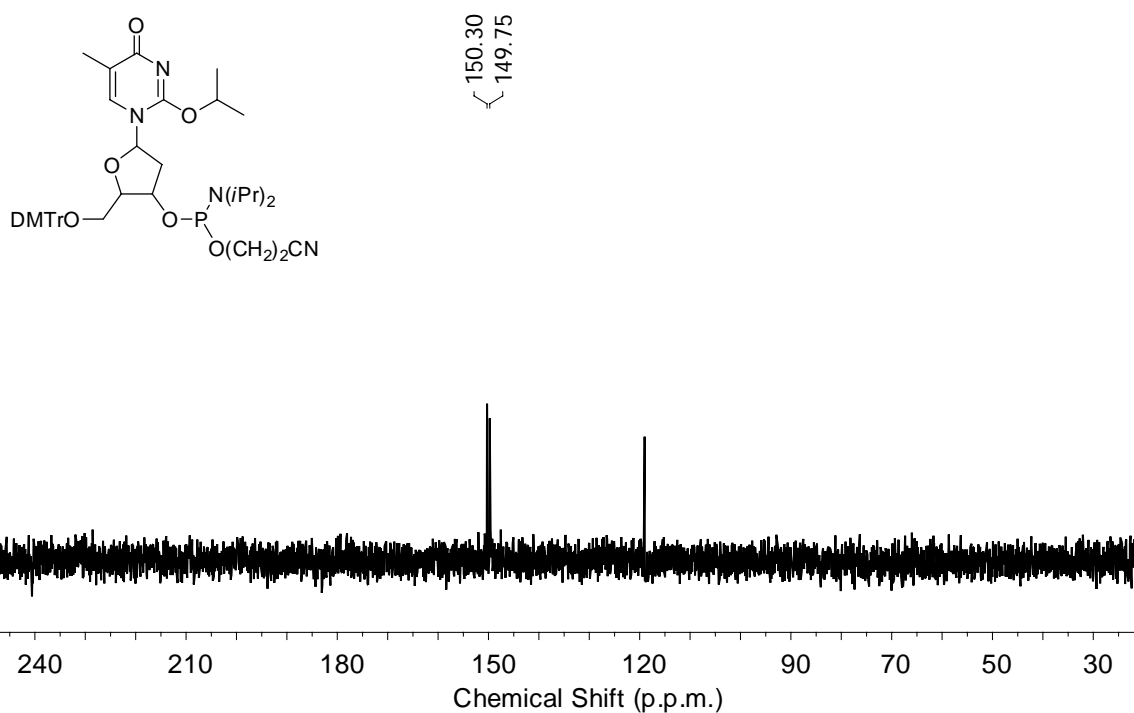

**Figure S12.**  $^{31}\text{P}$  NMR spectrum of phosphoramidite building block of  $O^2$ -iPrdT (80 MHz,  $\text{CDCl}_3$ , 25°C).

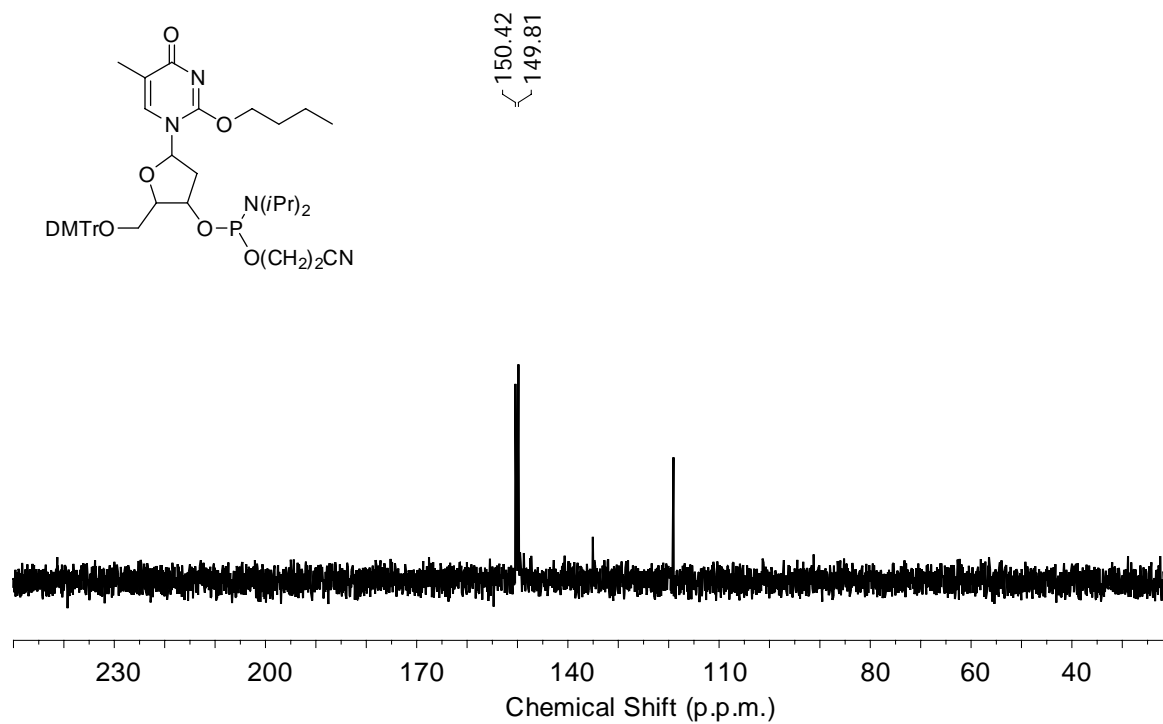

**Figure S13.**  $^{31}\text{P}$  NMR spectrum of phosphoramidite building block of  $O^2$ -nBudT (80 MHz,  $\text{CDCl}_3$ , 25°C).

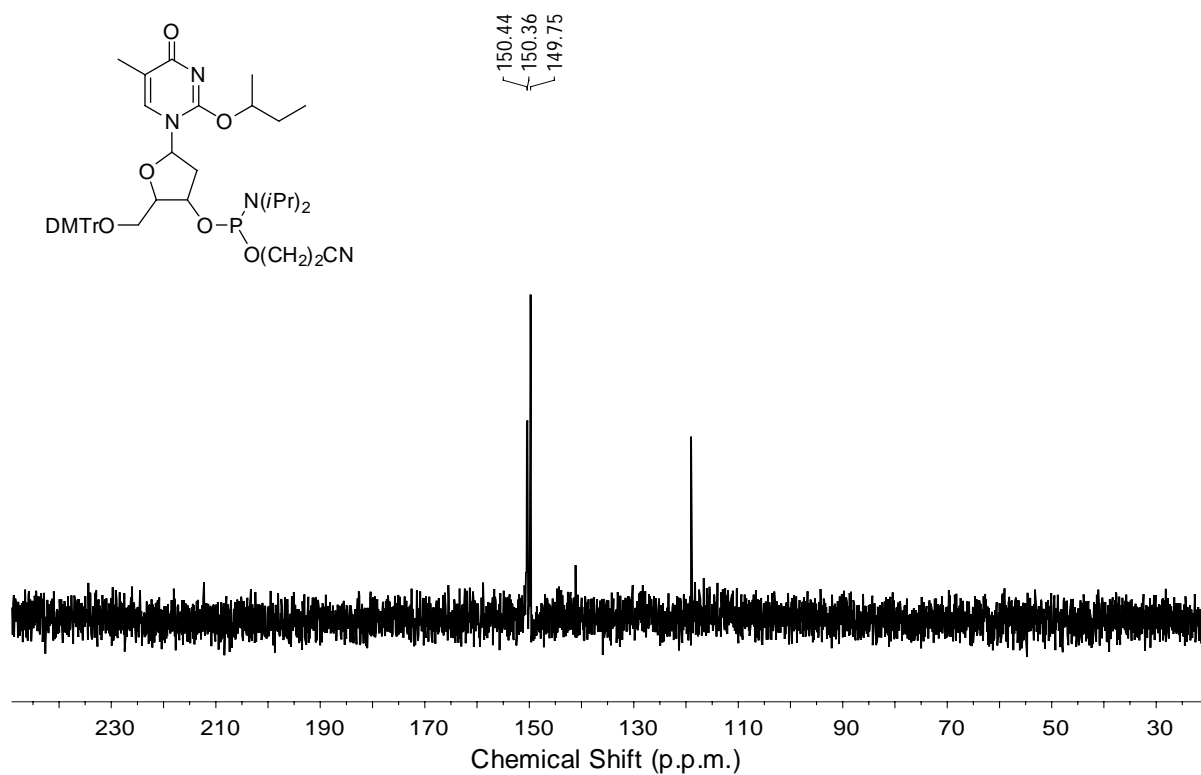

**Figure S14.**  $^{31}P$  NMR spectrum of phosphoramidite building block of  $O^2$ -sBudT (80 MHz,  $CDCl_3$ , 25°C).

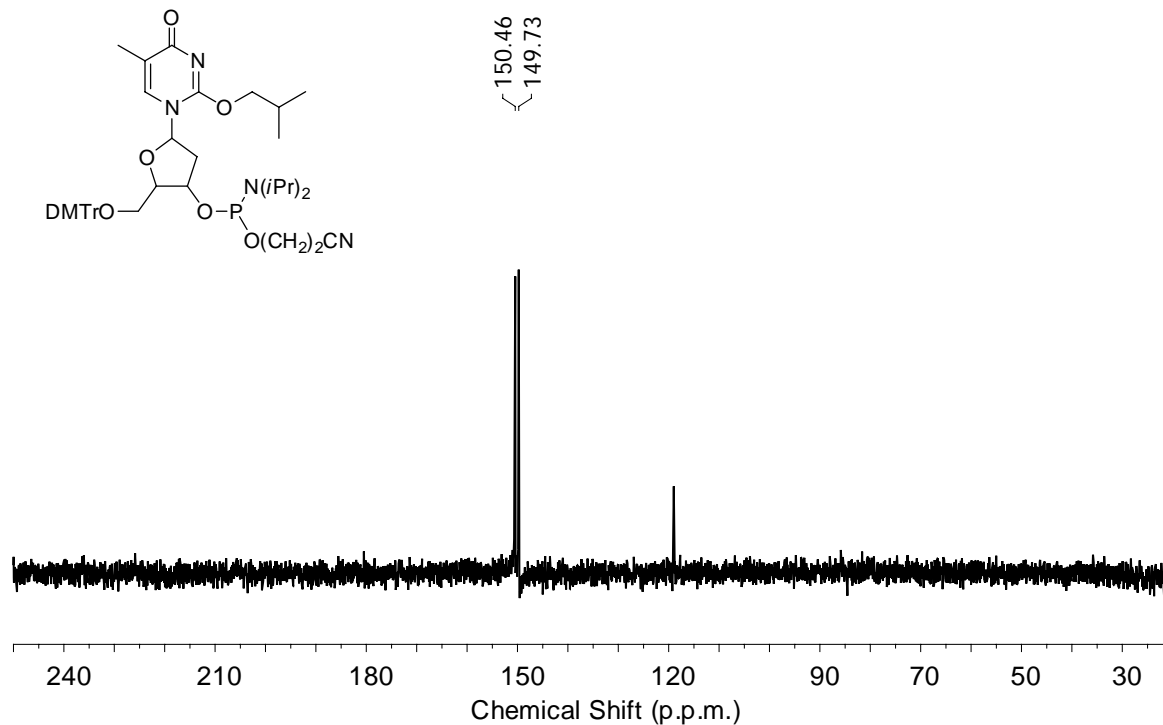

**Figure S15.**  $^{31}P$  NMR spectrum of phosphoramidite building block of  $O^2$ -iBudT (80 MHz,  $CDCl_3$ , 25°C).

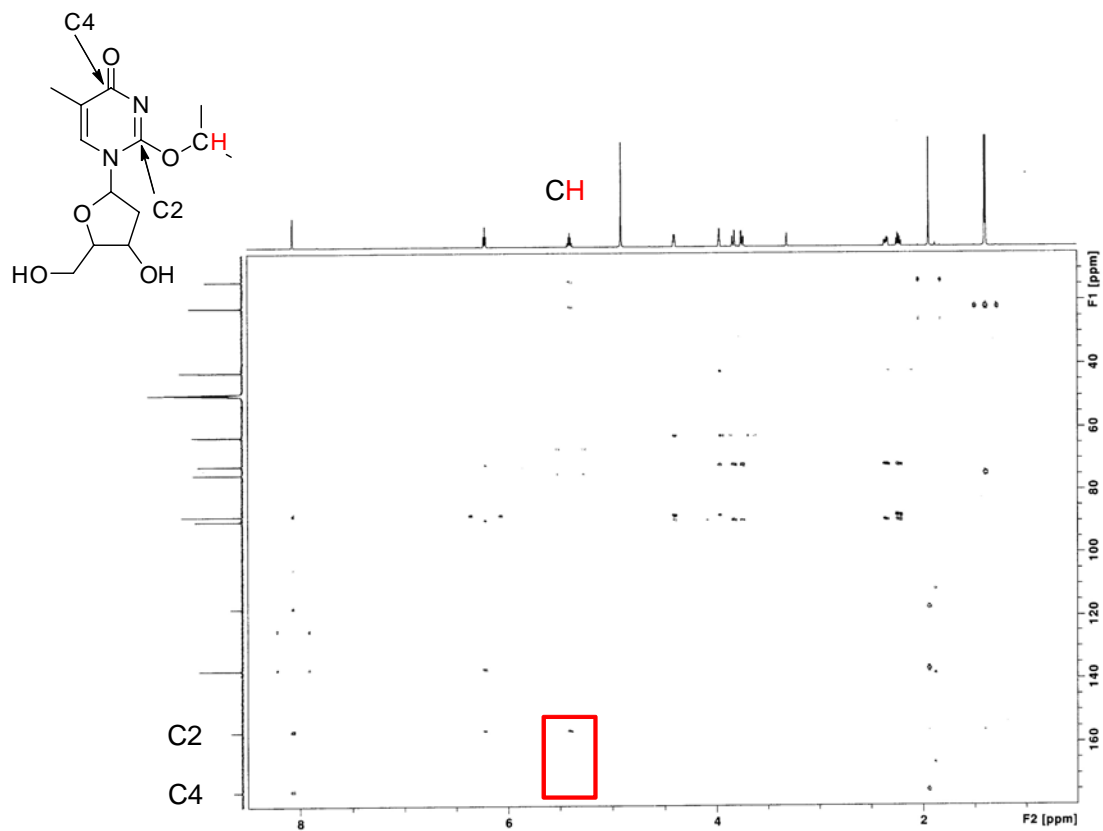

**Figure S16.** The 2-D HMBC spectrum of *O*<sup>2</sup>-iPrdT (600 MHz, CD<sub>3</sub>OD, 25°C) showing the correlation between the methine protons of the isopropyl functionality and the C2, but not the C4 carbon of the thymine ring.

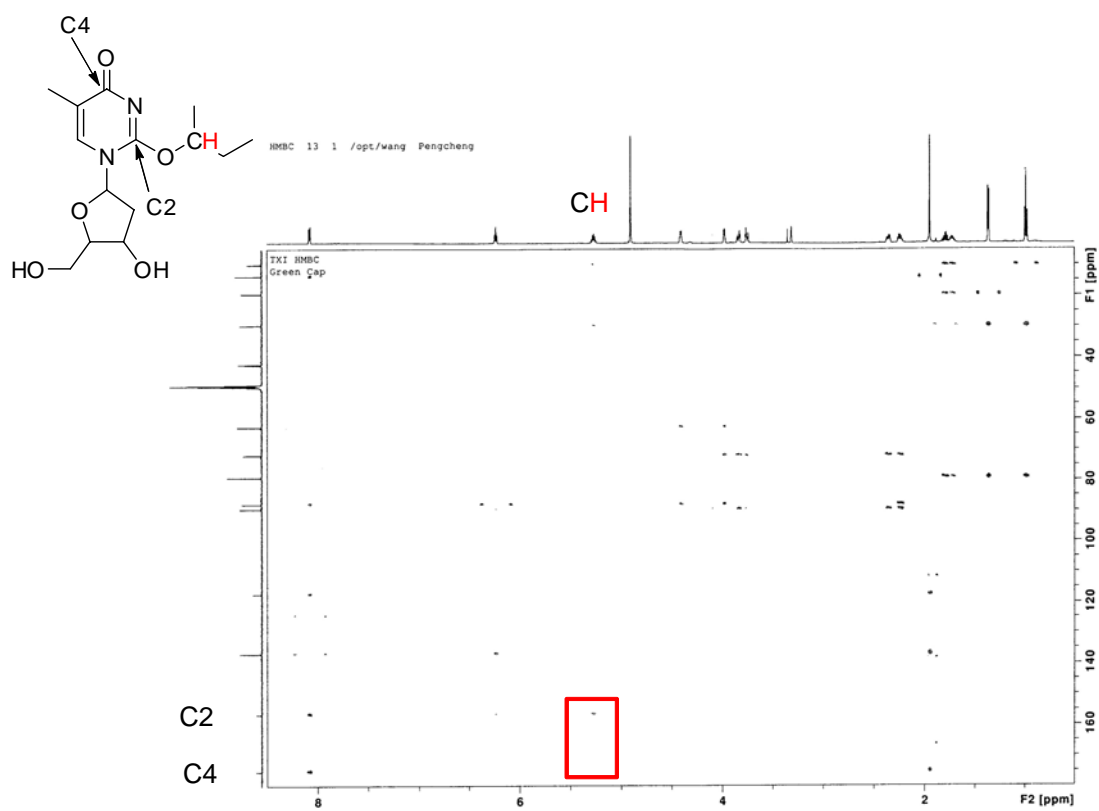

**Figure S17.** The 2-D HMBC spectrum of *O*<sup>2</sup>-*s*BudT (600 MHz, CD<sub>3</sub>OD, 25°C) showing the correlation between the methine proton of the *sec*-butyl functionality and the C2, but not the C4 carbon of the thymine ring.

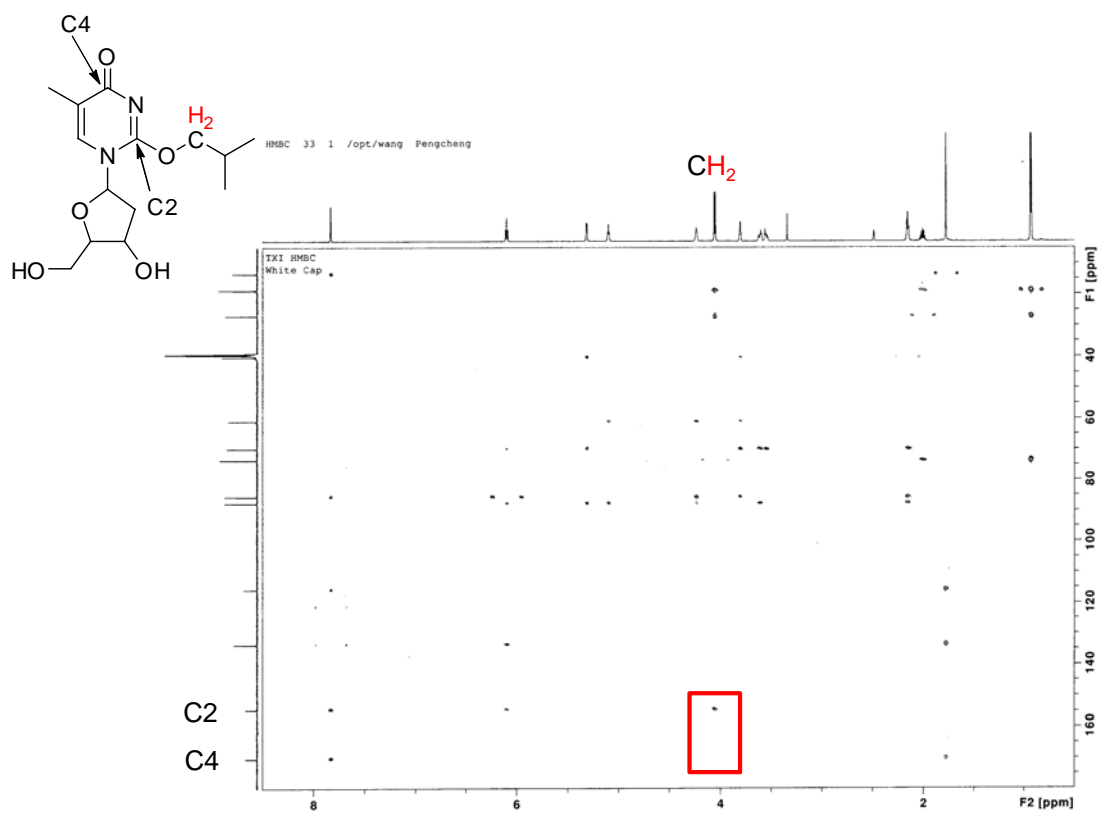

**Figure S18.** The 2-D HMBC spectrum of *O*<sup>2</sup>-*i*BudT (600 MHz, DMSO-*d*<sub>6</sub>, 25°C) showing the correlation between the methylene protons of the isobutyl functionality and the C2, but not the C4 carbon of the thymine ring.

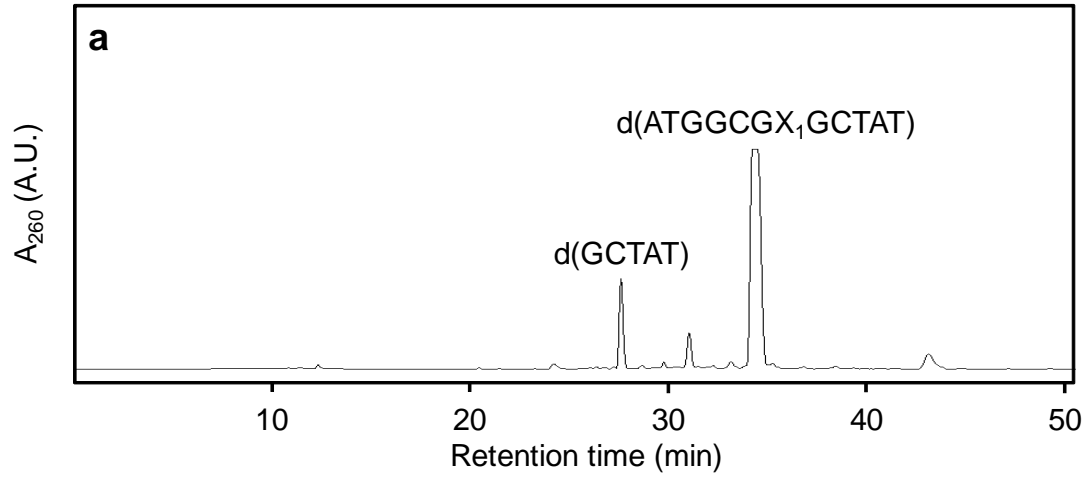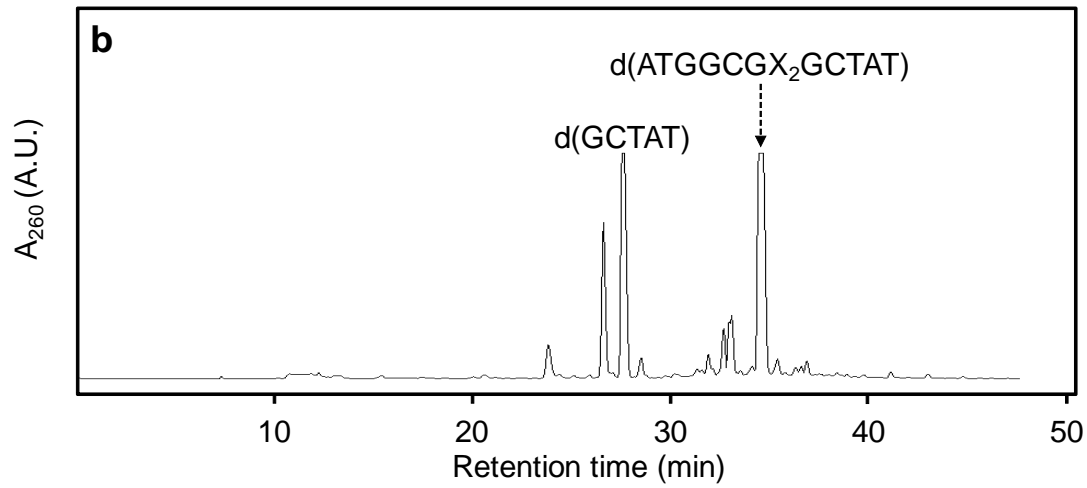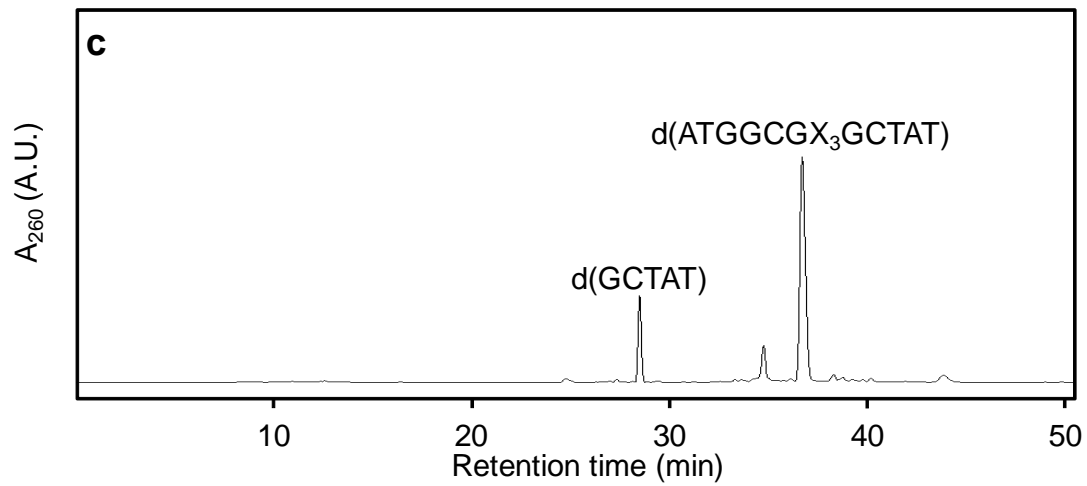



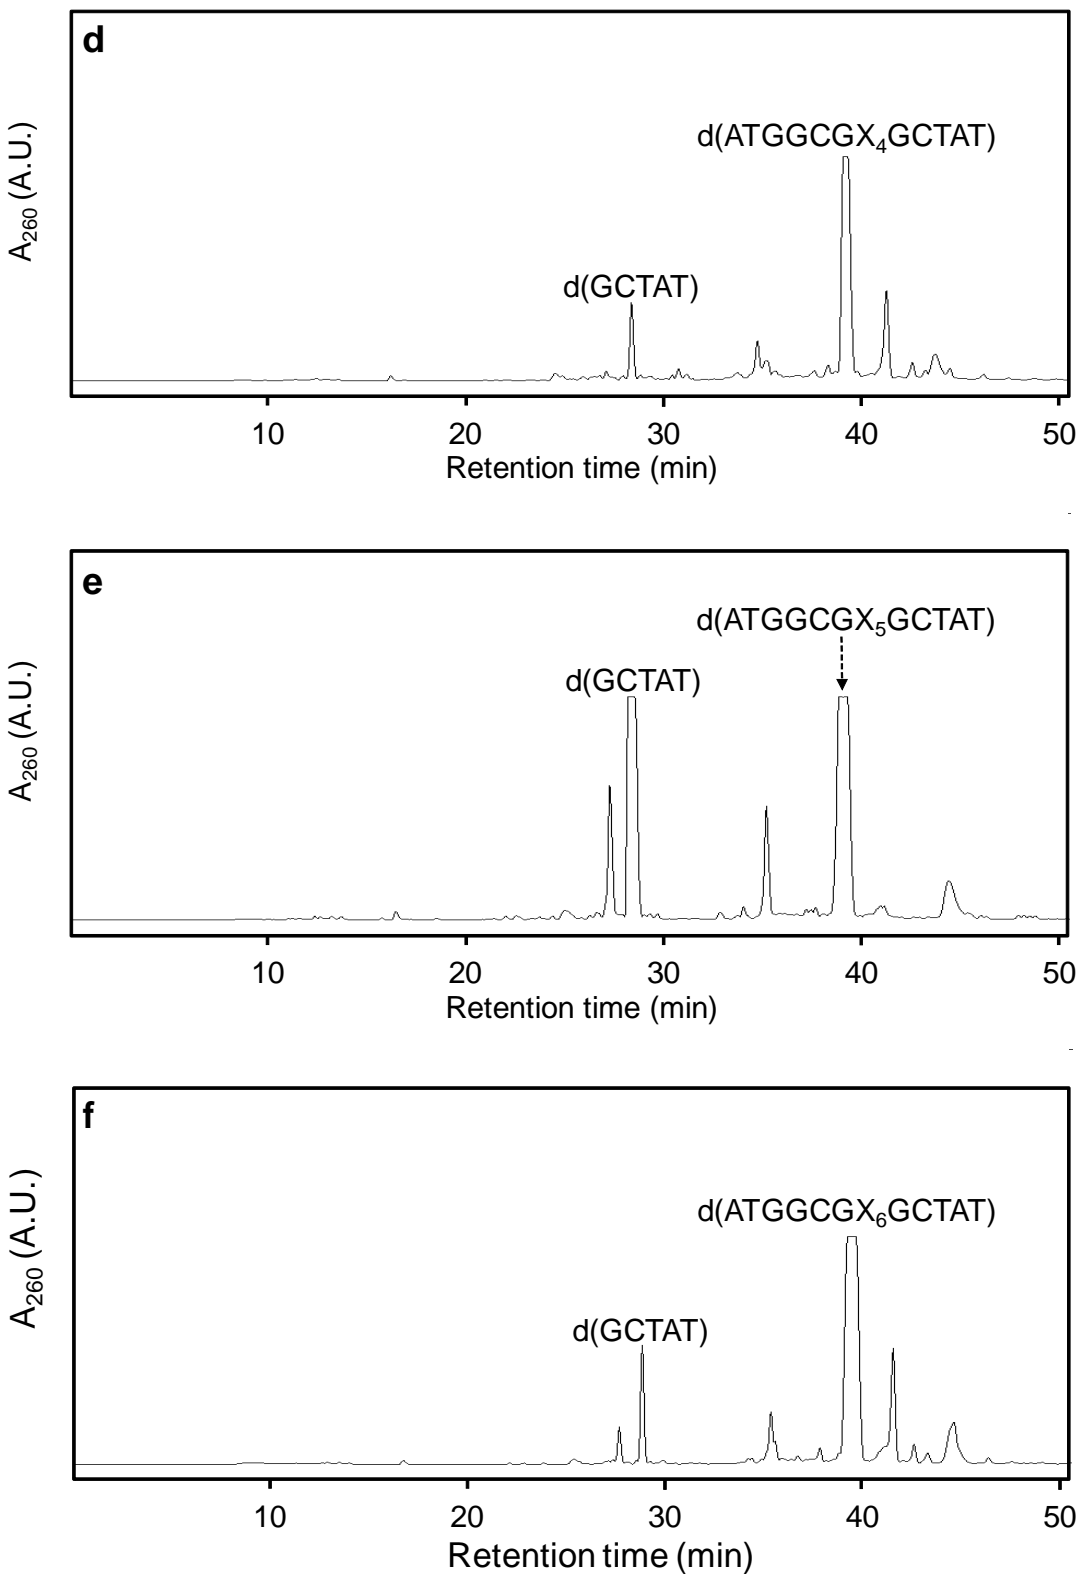

**Figure S19.** HPLC traces for the separation of the synthesized 12mer ODNs: (a)  $X_1 = O^2\text{-EtdT}$ ; (b)  $X_2 = O^2\text{-}n\text{PrdT}$ ; (c)  $X_3 = O^2\text{-}i\text{PrdT}$ ; (d)  $X_4 = O^2\text{-}n\text{BudT}$ ; (e)  $X_5 = O^2\text{-}s\text{BudT}$ ; (f)  $X_6 = O^2\text{-}i\text{BudT}$ .

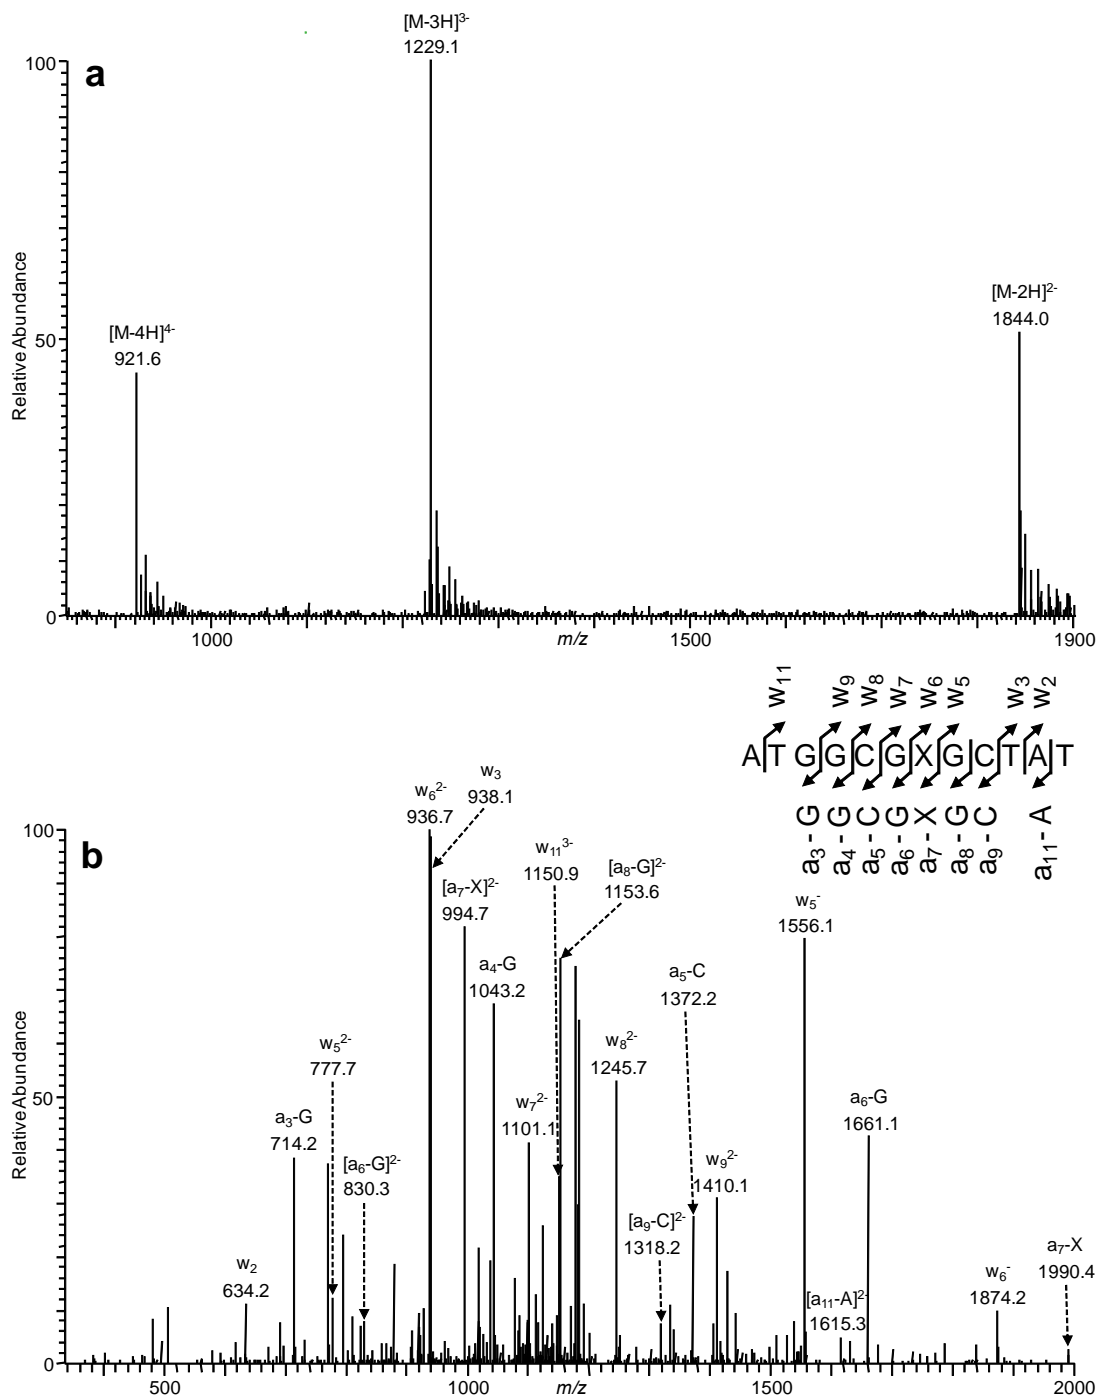

**Figure S20.** ESI-MS & MS/MS characterizations of d(ATGGCGXGCTAT), X=O<sup>2</sup>-MedT (a) Negative-ion ESI-MS; (b) the product-ion spectrum of the [M-3H]<sup>3-</sup> ion ( $m/z$  1229.1).

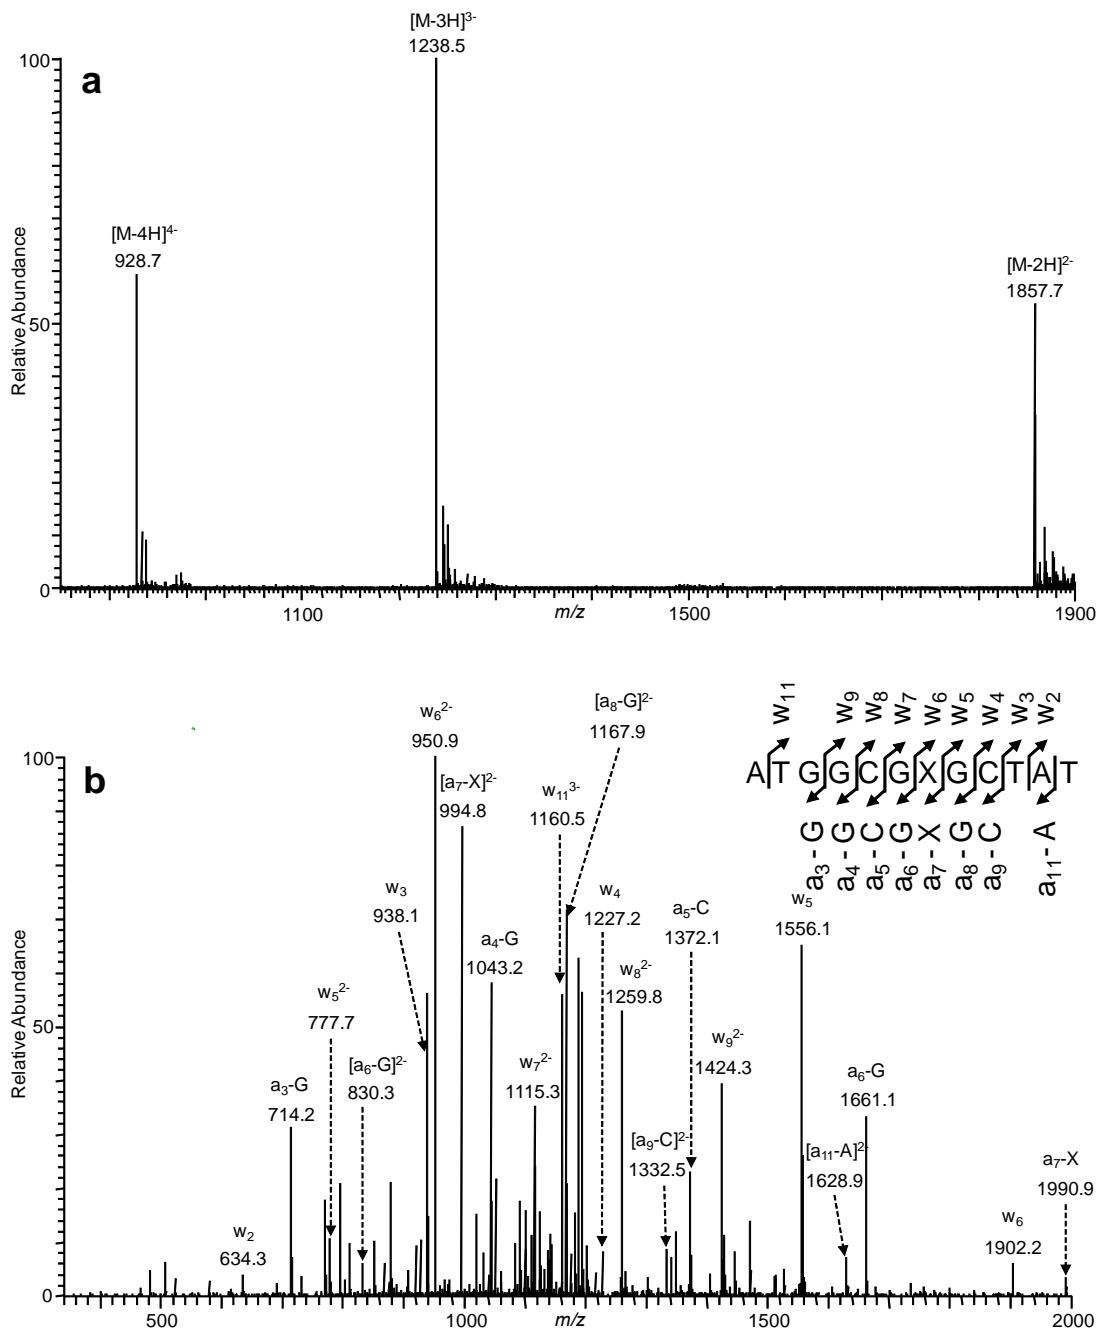

**Figure S21.** ESI-MS & MS/MS characterizations of d(ATGGCGXGCTAT),  $X=O^2-nPrdT$  (a) Negative-ion ESI-MS; (b) the product-ion spectrum of the  $[M-3H]^{3-}$  ion ( $m/z$  1238.5).

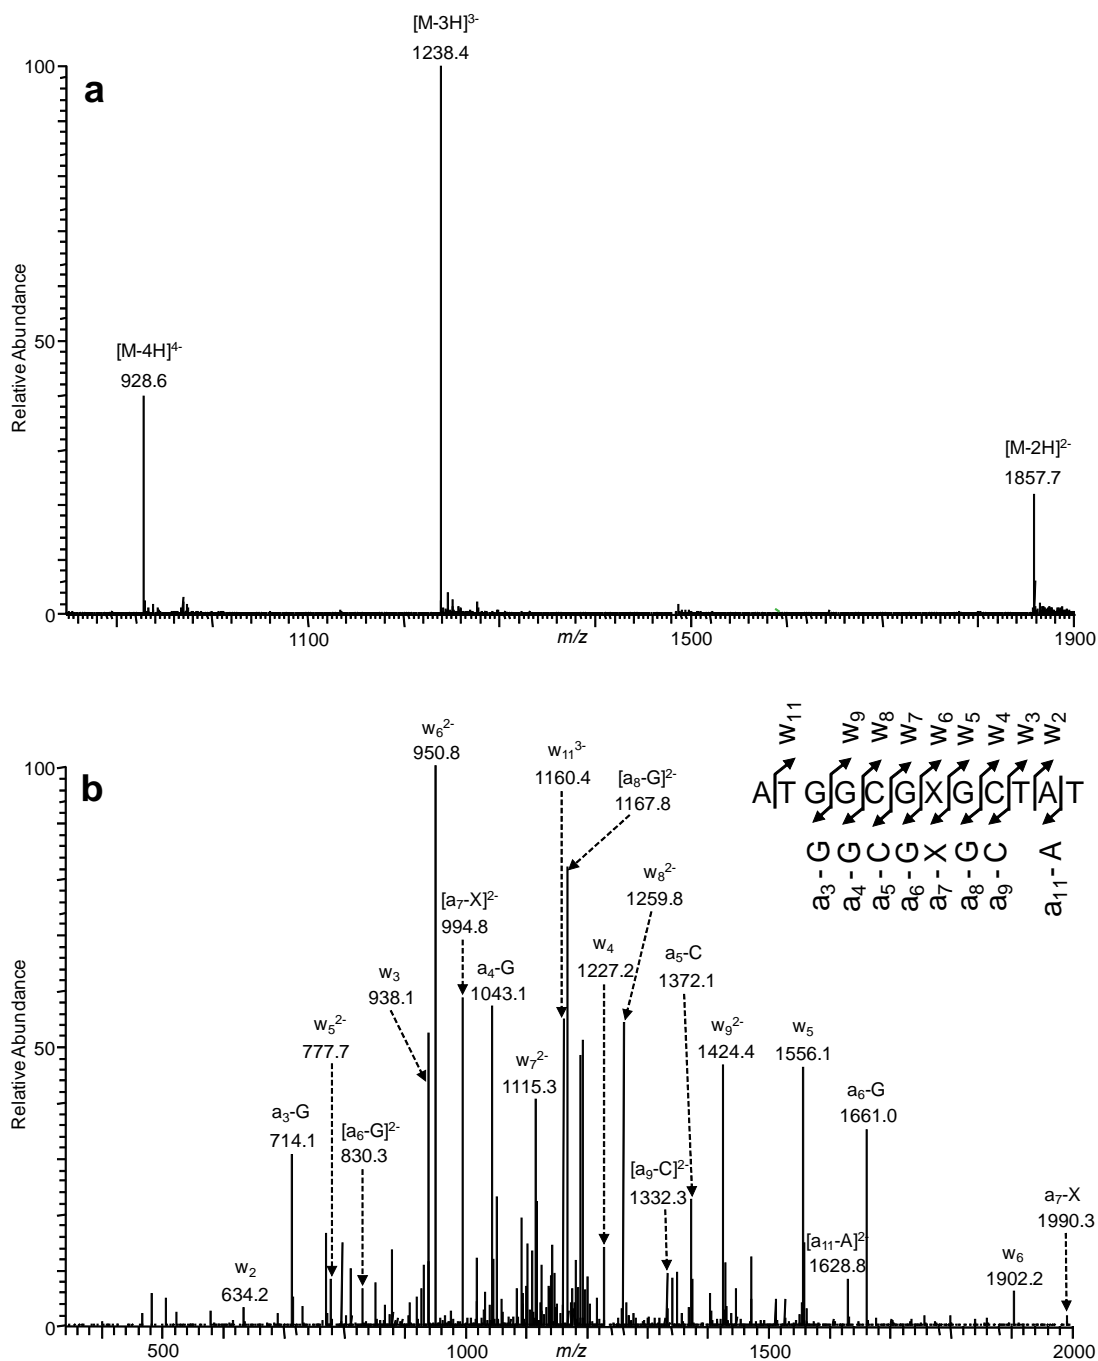

**Figure S22.** ESI-MS & MS/MS characterizations of d(ATGGCGXGCTAT), X= $O^2$ -iPrdT (a) Negative-ion ESI-MS; (b) the product-ion spectrum of the  $[M-3H]^{3-}$  ion ( $m/z$  1238.4).

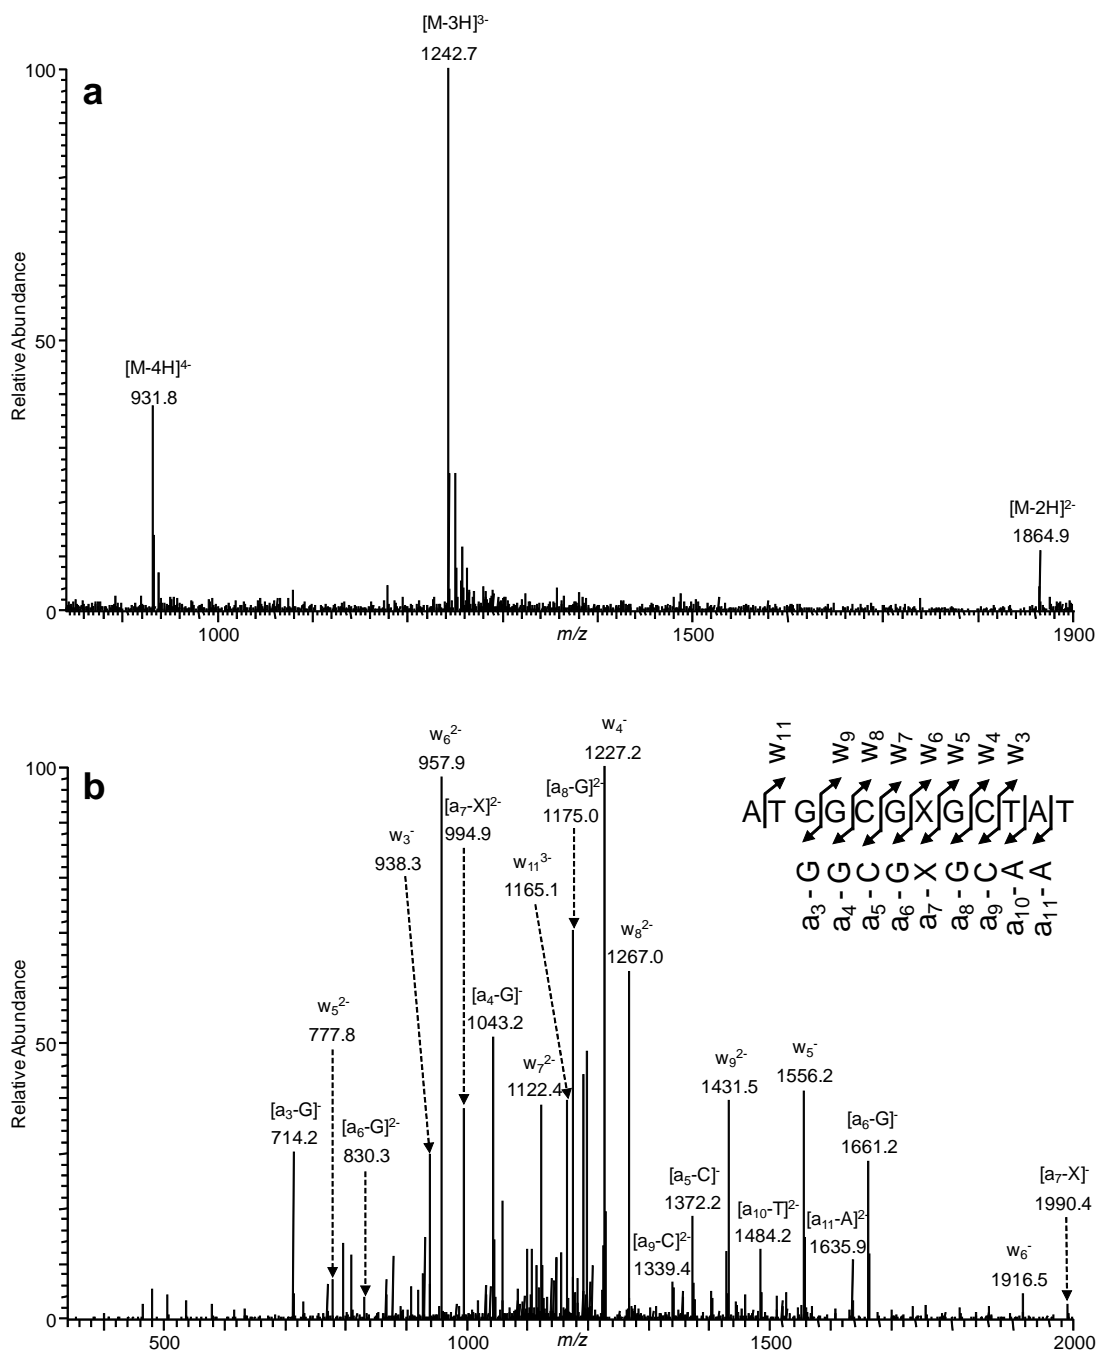

**Figure S23.** ESI-MS & MS/MS characterizations of d(ATGGCGXGCTAT), X= $O^2$ -nBudT (a) Negative-ion ESI-MS; (b) the product-ion spectrum of the  $[M-3H]^{3-}$  ion ( $m/z$  1242.7).

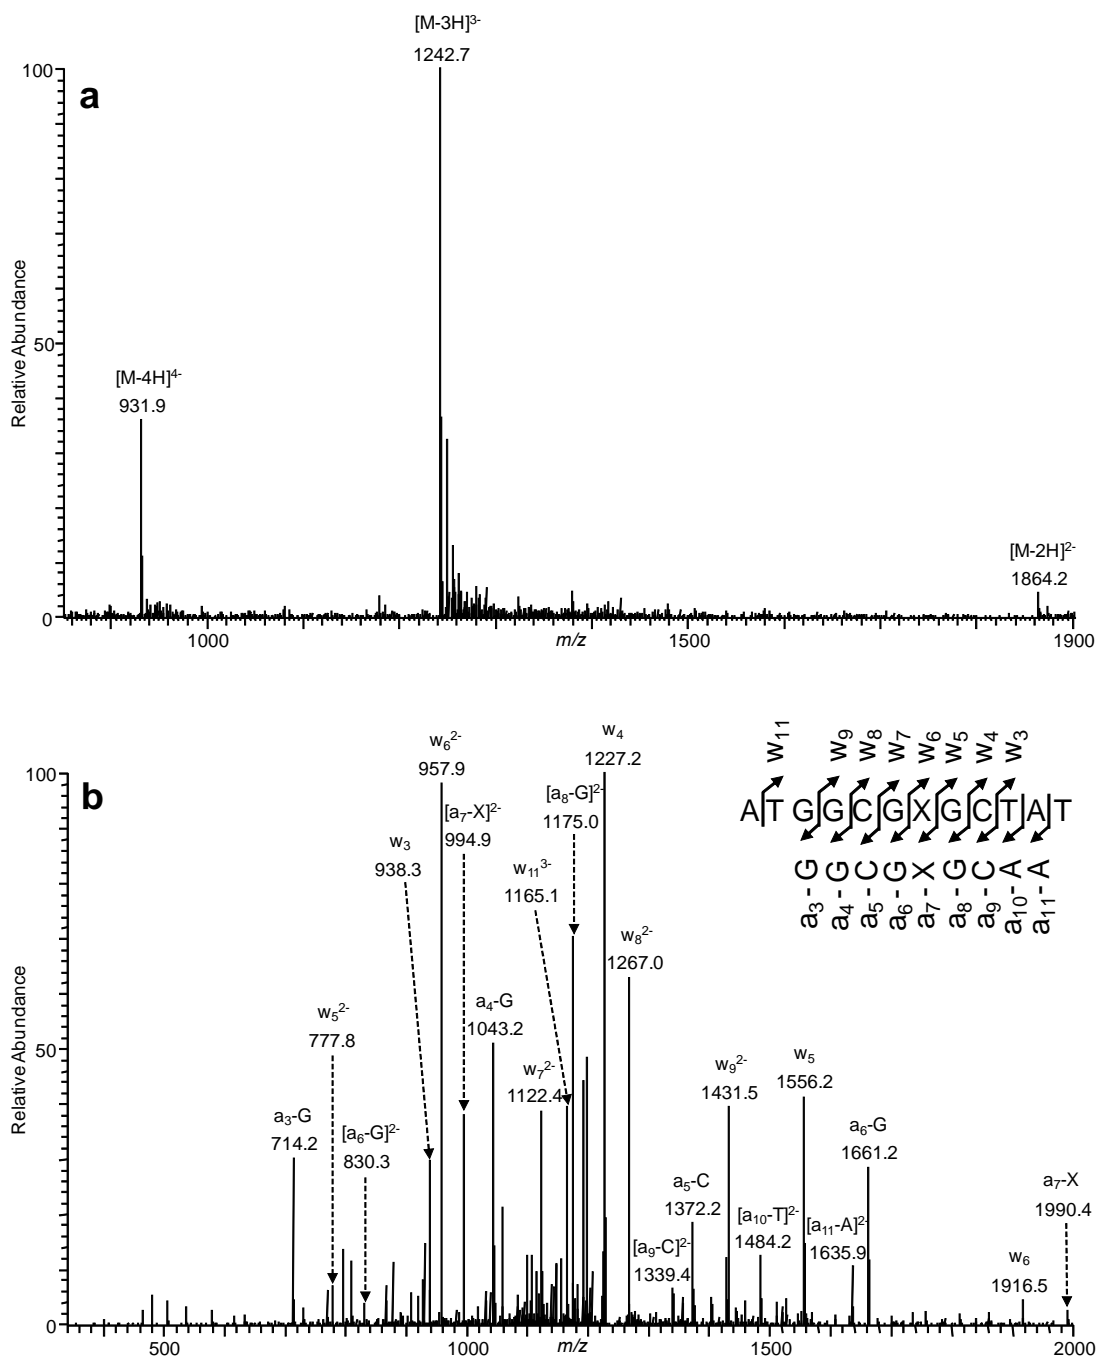

**Figure S24.** ESI-MS & MS/MS characterizations of d(ATGGCGXGCTAT), X=O<sup>2</sup>-sBudT (a) Negative-ion ESI-MS; (b) the product-ion spectrum of the [M-3H]<sup>3-</sup> ion ( $m/z$  1242.7).

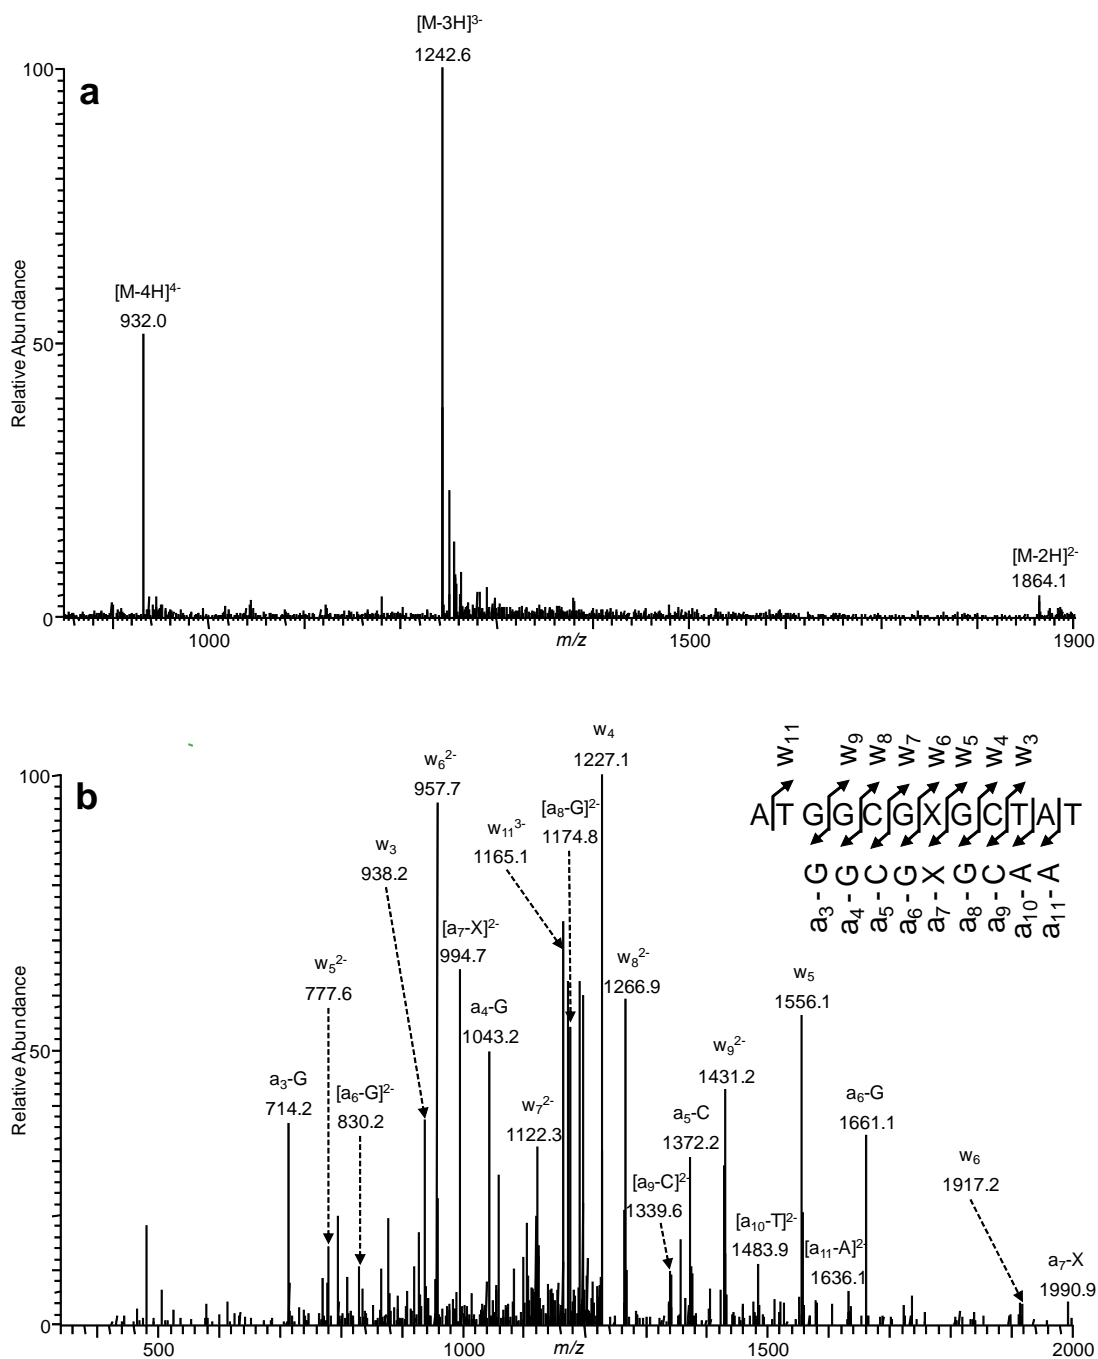

**Figure S25.** ESI-MS & MS/MS characterizations of d(ATGGCGXGCTAT), X= $O^2$ -iBudT (a) Negative-ion ESI-MS; (b) the product-ion spectrum of the  $[M-3H]^{3-}$  ion ( $m/z$  1242.6).

**a. Construction of Lesion-containing genome:**

5' - CAGGAAAGCTATGACCATGATTCAGTGAGTGGGAAGACATGGCGXGCTATAATTCACTGGCCGTCGTTTTACAACGTCGTGACTGGGAA - 3'  
3' - CTTTCGATACTGGTACTAAGTCACTCACCTTC - 5'      3' - CGATATTAAGTGACCGGCAGCAAAA - 5'

**b. Construction of competitor genome:**

5' - CAGGAAAGCTATGACCATGATTCAGTGAGTGGGAAGACATGGCGATAAGCTATAATTCACTGGCCGTCGTTTTACAACGTCGTGACTGGGAA - 3'  
3' - CTTTCGATACTGGTACTAAGTCACTCACCTTC - 5'      3' - CGATATTAAGTGACCGGCAGCAAAA - 5'

**Figure S26.** Schematic diagrams showing the construction of the lesion-containing (a) and competitor genomes. Displayed are the partial sequence of the linearized M13, the 22-mer lesion-containing or the 25-mer lesion-free insert (shown in red), and the two scaffolds employed for the ligation reactions. The lesion site is underlined (X).



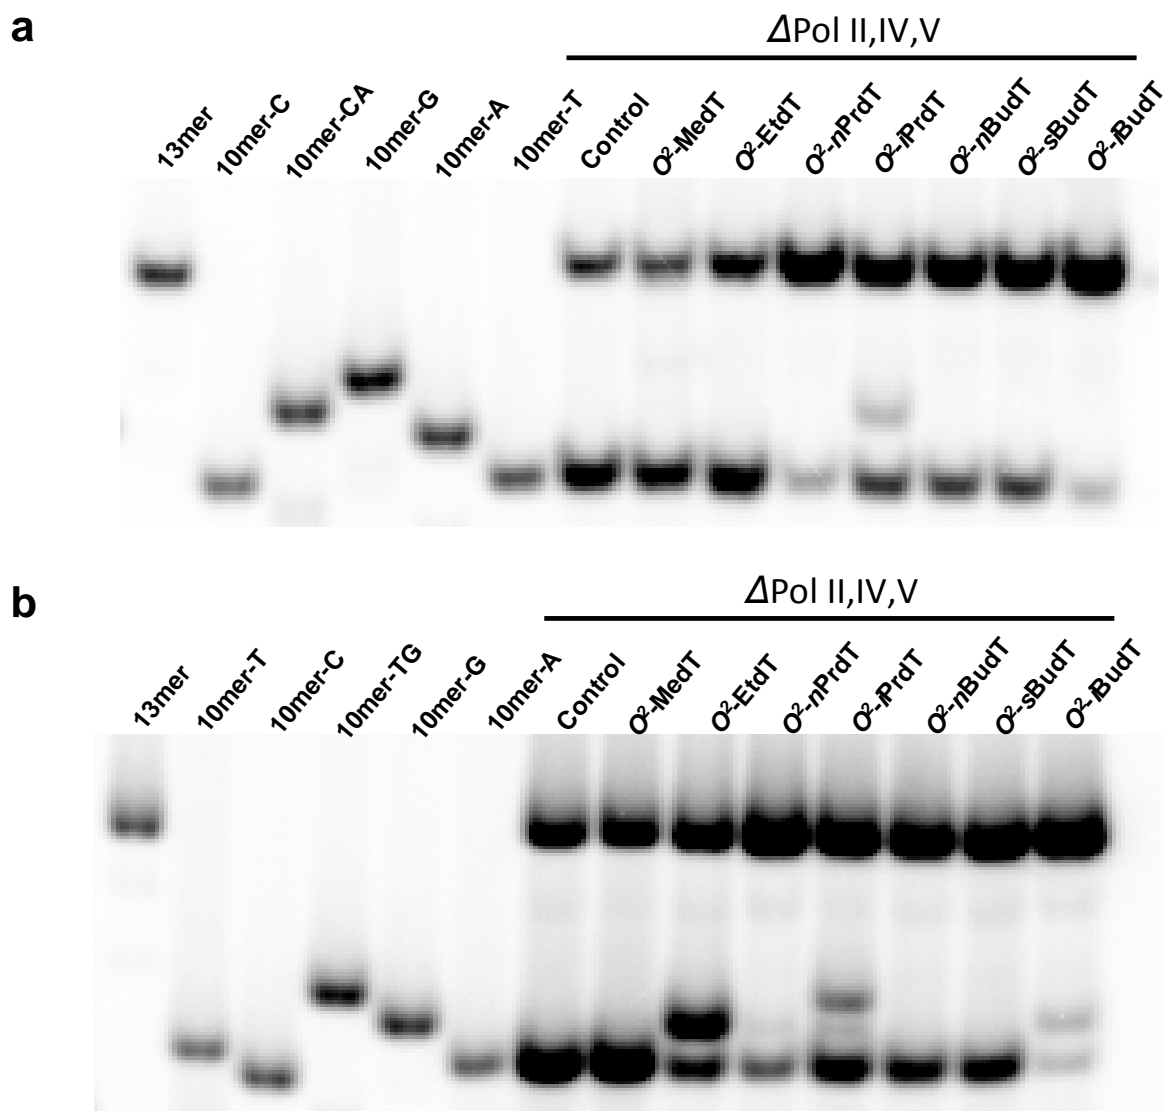

**Figure S27.** Native PAGE (30%) for monitoring the bypass efficiencies and mutation frequencies of  $O^2$ -alkyl dT lesions in SOS-induced AB1157 *E. coli* cells that are depleted in Pol II, Pol IV, and Pol V. (a) Gel image showing the 13-mer and 10-mer products released from the top-strand (lesion-containing strand) of the PCR products of the progeny of the competitor genome and the control or lesion-carrying genome, where 10mer-A, 10mer-C, 10mer-G, and 10mer-T represent the [5'- $^{32}$ P]-labeled standard ODNs 5'-GGCGMGCTAT-3', with 'M' being A, C, G, and T, respectively, and 10mer-CA designates TG $\rightarrow$ CA tandem double mutation (See text). (b) Gel image showing the 13-mer and 10-mer products released from the bottom-strand (opposite to lesion-containing strand) of the PCR products of the progeny of the competitor genome and the control or lesion-carrying genome, where 10mer A, 10mer C, 10mer G, and 10mer T represent the [5'- $^{32}$ P]-labeled standard ODNs 5'-AATTATAGCN-3', with 'N' being A, C, G, and T, respectively. The lesion-containing genomes were mixed individually with the competitor genome at molar ratios of 10:1 or 20:1 for the transfection experiments (See Materials and Methods).

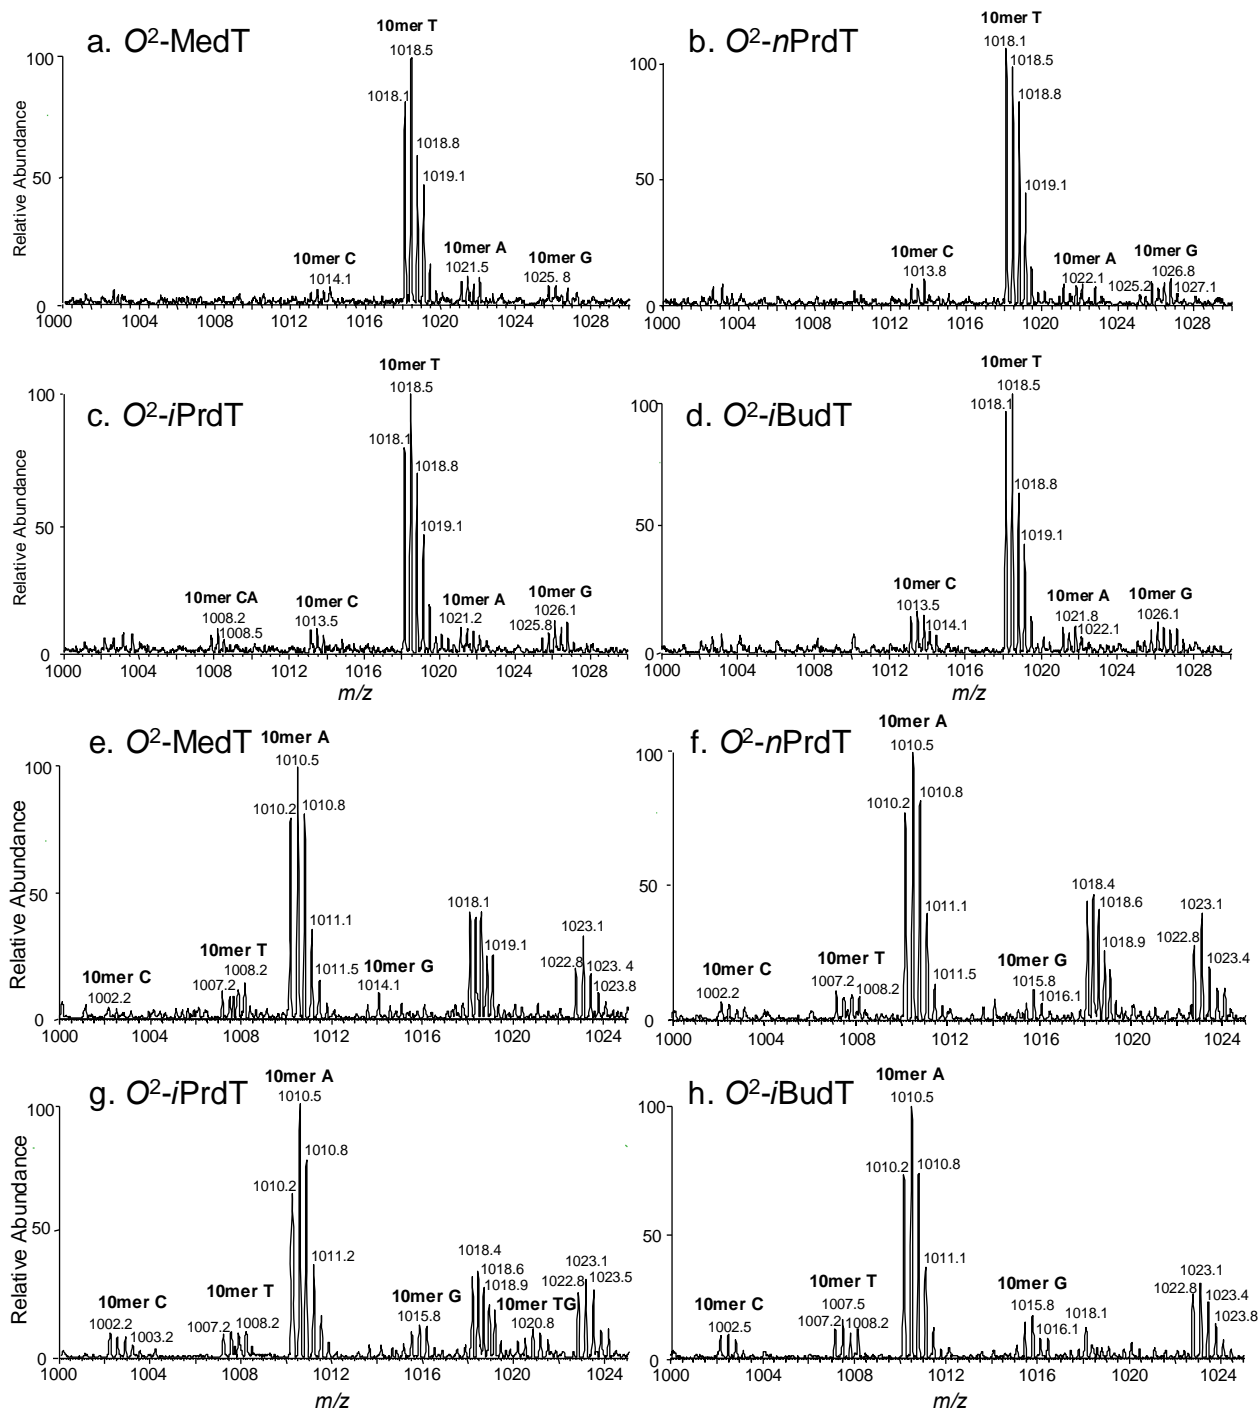

**Figure S28.** Higher-resolution “ultra zoom” scan ESI-MS for the restriction fragments for the PCR products from the replication of  $O^2$ -MedT (a, e),  $O^2$ -nPrdT (b, f),  $O^2$ -iPrdT (c, g) and  $O^2$ -iBudT (d, h)-bearing single-stranded M13 genomes in SOS-induced wild-type AB1157 cells. Displayed in (a)-(d) are the  $[M - 3H]^{3-}$  ions for the lesion-containing strand products, and in (e)-(h) are the  $[M - 3H]^{3-}$  ions for the complementary strand products. All the mutagenic products were further confirmed by MS/MS analyses, and representative MS/MS results for  $O^2$ -iPrdT are shown in Figures S29-S30.

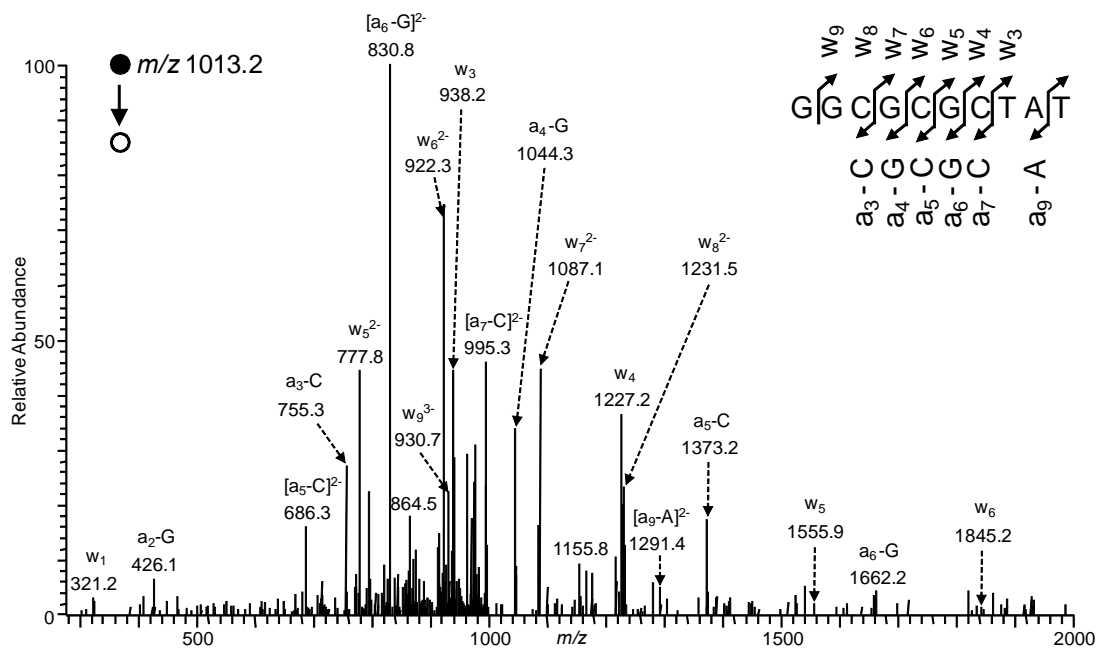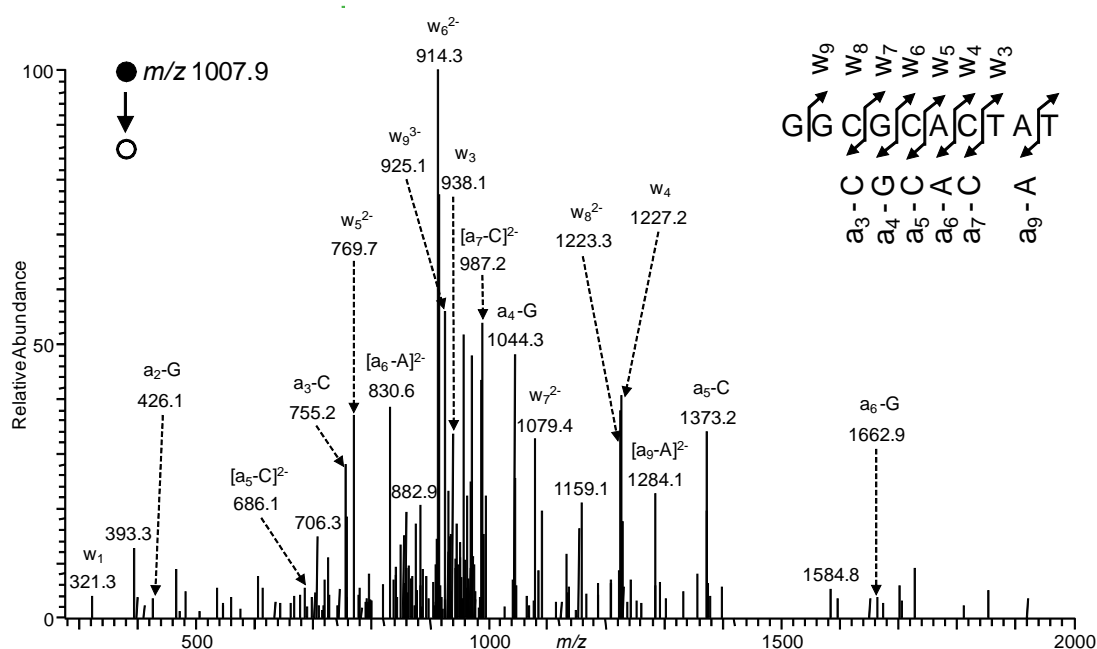

**Figure S29.** LC-MS/MS for the identification of restriction fragments of PCR products. MS/MS for the  $[M - 3H]^{3-}$  ions of 10 mer C (top) and 10 mer CA (bottom) products from for the progeny of  $O^2$ -iPrdT-containing genome in SOS-induced wild-type AB1157 cells. Because of overlap in signal of the  $[M - 3H]^{3-}$  ion of 10 mer A and the  $[M - 4H + Na^+]^{3-}$  ion of 10 mer C as well as between the  $[M - 3H]^{3-}$  ion of 10 mer G and the  $[M - 4H + Na^+]^{3-}$  ion of 10 mer T, the T  $\rightarrow$  A and T  $\rightarrow$  G mutation products were monitored using the complementary strand (Figure S30).

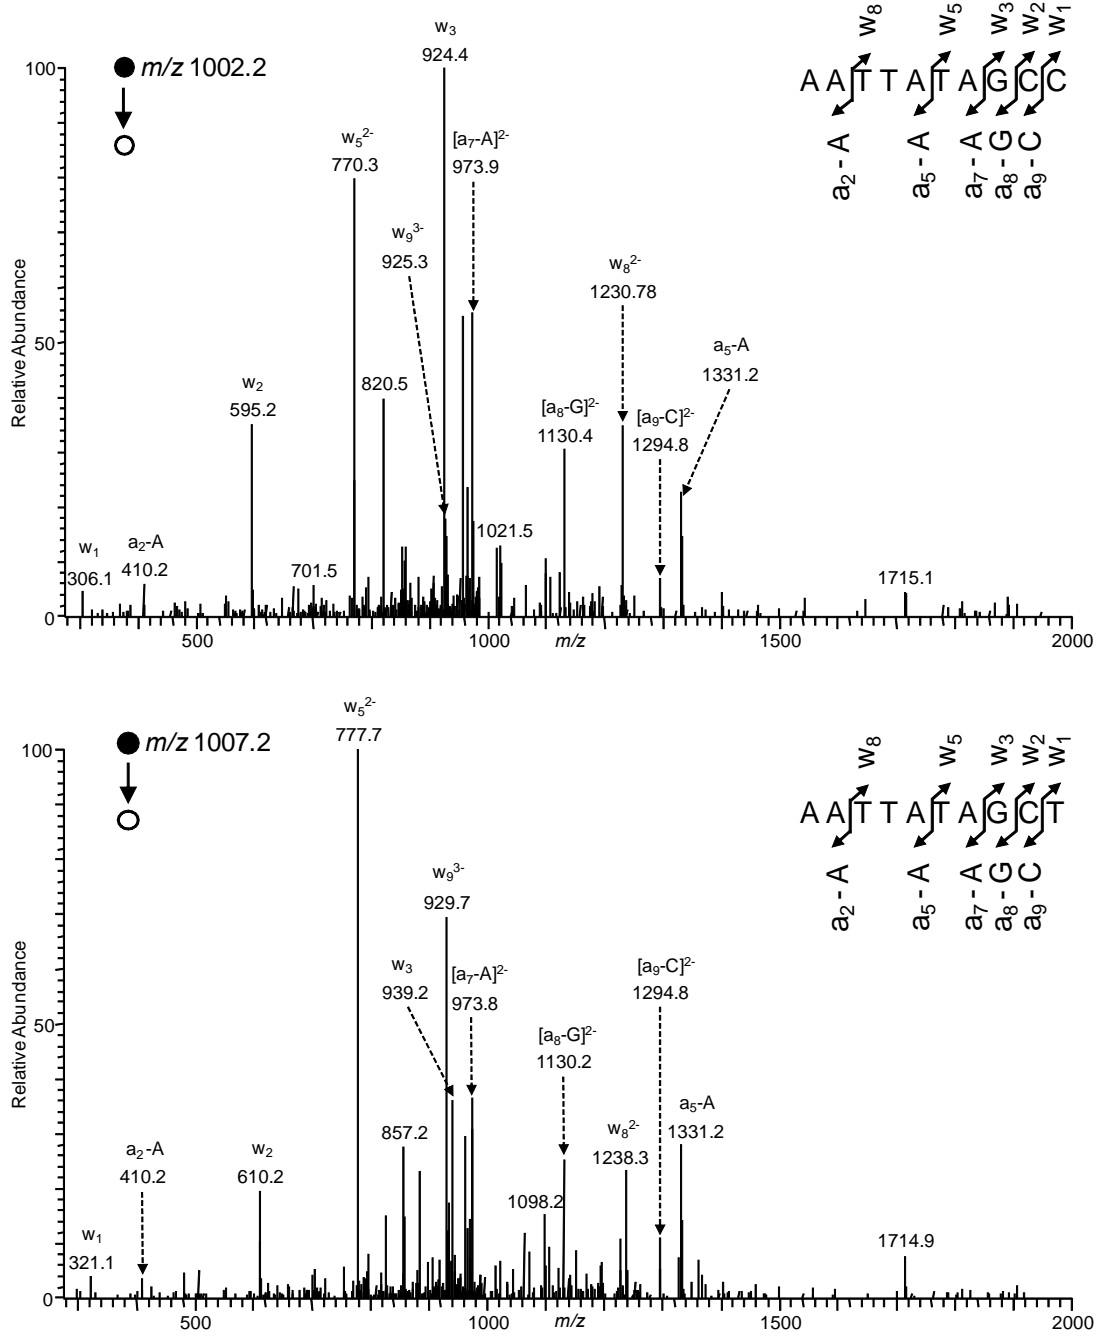

**Figure S30.** LC-MS/MS for the identification of restriction fragments of PCR products in SOS-induced wild-type AB1157 cells. MS/MS for the  $[M - 3H]^{3-}$  ions of 10 mer C (corresponding to T  $\rightarrow$  G mutation at the lesion site, top), 10 mer T (corresponding to T  $\rightarrow$  A mutation at the lesion site, bottom).
